# Supplementary material for: Light-Inducible System for Tunable Protein Expression inNeurospora crassa
Source: Oxford University Press journal article supplement (doi:10.1534/g3.112.003939), 2012-10-01
Supplement: 1207_003939si.pdf [file 1207_003939si.pdf]

## File S1

### Supporting Results and Discussion

#### Strain creation and genotype testing

3000 bp of upstream sequence from the ATG of *vvd* was fused to *wc-1* which was tagged with the V5 tag followed by 500 bp of the *vvd* 3' UTR. This cassette was linked to the *bar* gene (which confers resistance to ignite) and was targeted by transformation to the *csr-1* locus (BARDIYA and SHIU 2007) in WT and  $\Delta vvd$  strains, creating strains WC-1 WT and WC-1  $\Delta vvd$  respectively (Figure S1A). A construct containing 3000 bp of the *vvd* promoter was fused to *gfp* followed by 500 bp of the *vvd* 3' UTR. This cassette was linked to the *bar* gene and was targeted by transformation to the *csr-1* locus in the  $\Delta vvd$  strain creating strain GFP (Figure S1A). 3000 bp of the *vvd* promoter was fused to the *gh-5-1* gene followed by the *gfp* gene linked to the *His*<sup>6</sup> tag, with 500 bp of the *vvd* 3' UTR on the 3' end. This cassette was targeted by transformation to the *csr-1* locus in the  $\Delta vvd$  strain creating strain GH5-1 (Figure S1A). Genotyping of the *csr-1* locus was achieved by allelic-specific nested PCR (primers listed in Table S1). The control strain (74A) shows two bands, the 350 bp band representing the intact locus of *csr-1* while the 750 bp band represents the presence of the *actin* locus, a positive control (Figure S1B). As expected, strains WC-1 WT, WC-1  $\Delta vvd$ , GFP and GH5-1 strains all show only the 750 bp band, indicating that *csr-1* is no longer present and the strains are homokaryon for the cassette of interest at the *csr-1* locus as expected with this type of transformation (Figure S1B) (BARDIYA and SHIU 2007).

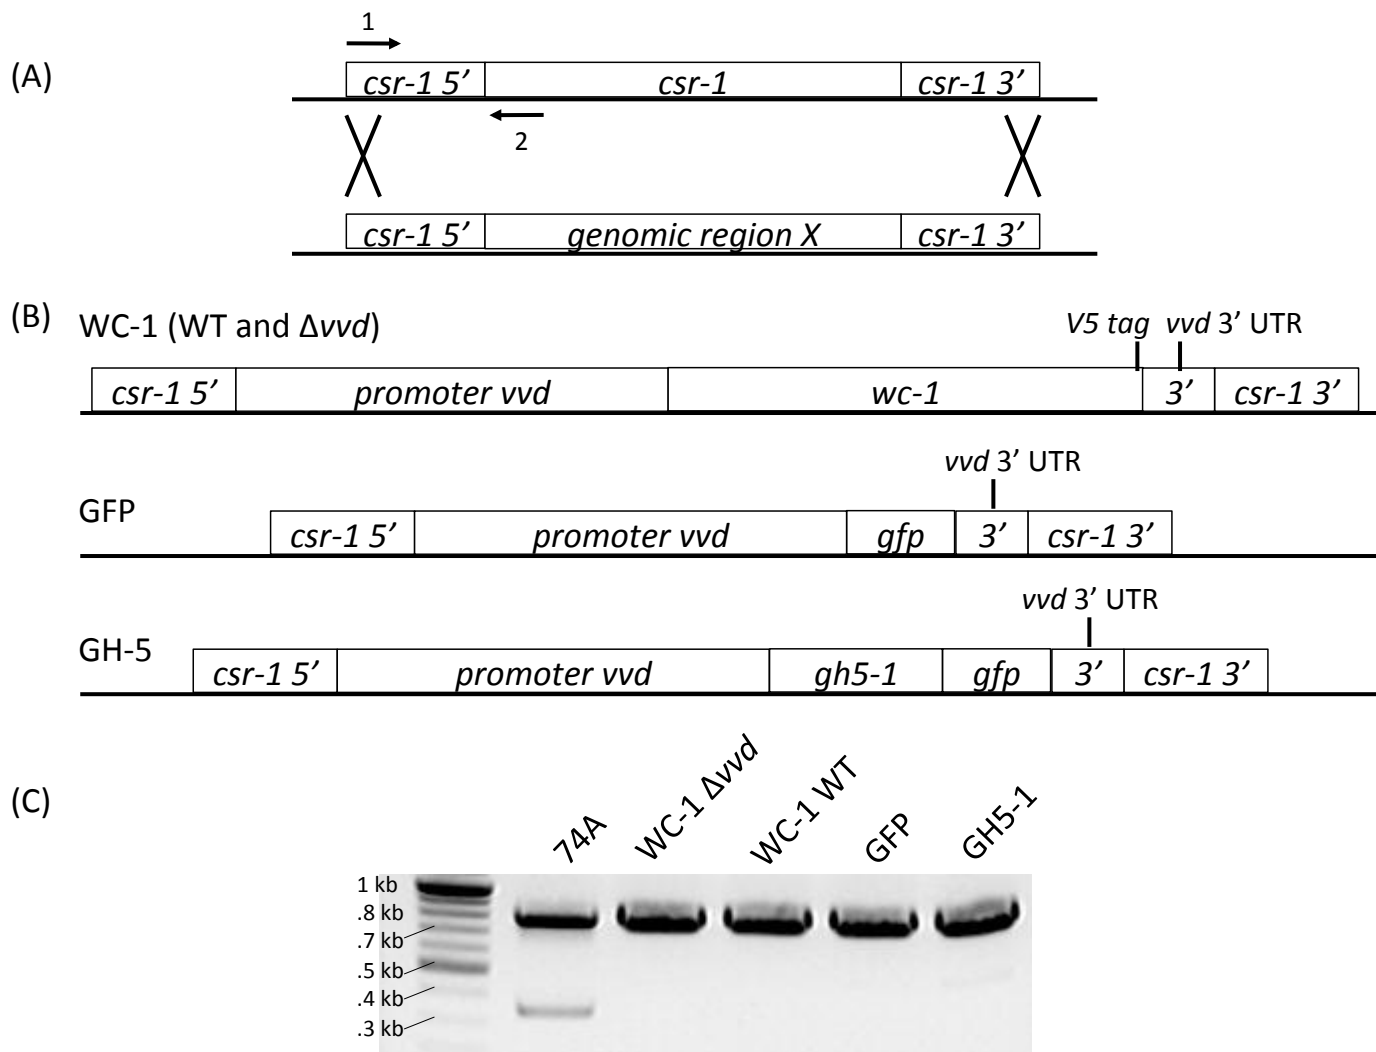

**Figure S1** Constructs used to examine *vvd* promoter-driven gene expression. (A) Constructs bearing either *wc-1*, *gfp* or *gh5-1* were transformed into a WT or  $\Delta vvd$  strain at the *csr-1* locus (BARDIYA and SHIU 2007). The arrows represent primers used in the PCR genotyping analysis in (B). Representation of constructs designed to test expression from the *vvd* promoter. Cassette containing *gh5-1* is based off of the design from Sun et. al. using the *vvd* promoter in place of the *ccg-1* promoter (SUN et al. 2011). (C) Genomic DNA samples from *wt*,  $\Delta vvd$  *wc-1<sup>v5</sup>*, *wt wc-1<sup>v5</sup>*, *gfp* and *gh5-1* strains were subjected to PCR analysis to examine the *csr-1* locus. Bands at 350 bp represent the presence of the *csr-1* locus while bands at 750 bp represent the presence of the *actin* locus (+ control).

BARDIYA, N., and P. K. SHIU, 2007 Cyclosporin A-resistance based gene placement system for *Neurospora crassa*. *Fungal Genet Biol* **44**: 307-314.

SUN, J., C. M. PHILLIPS, C. T. ANDERSON, W. T. BEESON, M. A. MARLETTA et al., 2011 Expression and characterization of the *Neurospora crassa* endoglucanase GH5-1. *Protein Expr Purif* **75**: 147-154.

Table S1 Vectors and Primers

PVVD-GH-5 :

TCGCGCGTTTTCCGGTGATGACGGTGAAAACCTCTGACACATGCAGCTCCCGGAGACGGTCACAGCTTGTCTG  
TAAGCGGATGCCGGGAGCAGACAAGCCCGTCAGGGCGCGTCAGCGGGTGTGGCGGGTGTGGGGCTGGCT  
TAACTATGCGGCATCAGAGCAGATTGTACTGAGAGTGCACCATAACCACAGCTTTTCAATTCAATTCATCAT  
TTTTTTTTTATTCTTTTTTTGATTTCCGGTTTCTTTGAAATTTTTTTGATTCCGGTAATCTCCGAACAGAAG  
GAAGAACGAAGGAAGGAGCACAGACTTAGATTGGTATATATACGCATATGTAGTGTGAAGAAAACATGAAA  
TTGCCAGTATTCTTAACCCAACAGCAGACAAGAAAACCTGCAGGAAACGAAGATAAATCATGTGCGAAAG  
CTACATATAAGGAACGTGCTGCTACTCATCTAGTCTGTTGCTGCCAAGCTATTTAATATCATGCACGAA  
AAGCAAACAAAATTGTGTGCTTCATTGGATGTTTCGTACCACCAAGGAATTACTGGAGTTAGTTGAAGCATT  
AGGTCCCAAAATTTGTTTACTAAAAACACATGTGGATATCTTGACTGATTTTTTCCATGGAGGGCACAGTTA  
AGCCGCTAAAGGCATTATCCGCCAAGTACAATTTTTTACTCTTCGAAGACAGAAAATTTGCTGACATTGGT  
AATACAGTCAAATTGCAGTACTCTGCGGGTGTATACAGAATAGCAGAATGGGCAGACATTACGAATGCACA  
CGGTGTGGTGGGCCAGGTATTGTTAGCGGTTTTGAAGCAGGCGGCAGAAGAAGTAACAAAGGAACCTAGAG  
GCCTTTTGTATGTTAGCAGAATTGTCATGCAAGGGCTCCCTATCTACTGGAGAATATACTAAGGGTACTGTT  
GACATTGCGAAGAGCGACAAAGATTTTTGTTATCGGCTTTATTGCTCAAAGAGACATGGGTGGAAGAGATGA  
AGGTTACGATTGGTTGATTATGACACCCGGTGTGGGTTTAGATGACAAGGGAGACGCATTGGGTCAACAGT  
ATAGAAGCGTGGATGATGTGGTCTCTACAGGATCTGACATTATTATTGTTGGAAGAGGACTATTTGCAAAG  
GGAAGGGATGCTAAGGTAGAGGGTGAACGTTACAGAAAAGCAGGCTGGGAAGCATATTTGAGAAGATCGCG  
CCAGCAAAAACAAAACTGTATTATAAGTAAATGTATATACTAAACTCACAATTTAGAGCTTCAATTT  
AATTATATCAGTTATTACCCTATGCGGTGTGAAATACCGCACAGATGCGTAAGGAGAAAATACCGCATCAG  
GAAATTGTAAACGTTAATATTTTTGTTAAAATTCGCGTTAAATTTTTGTTAAATCAGCTCATTTTTTTAACCA  
ATAGGCCGAAATCGGCAAAATCCCTTATAAATCAAAAAGAATAGACCGAGATAGGGTTGAGTGTGTTCCAG  
TTTGGAACAAGAGTCCACTATTAAGAACGTGGACTCCAACGTCAAAGGGCGAAAAACCGTCTATCAGGGC  
GATGGCCACTACGTGAACCATCACCTAATCAAGTTTTTTGGGGTTCGAGGTGCCGTAAGCACTAAATCG  
GAACCCTAAAGGGAGCCCCGATTTAGAGCTTGACGGGAAAGCCGGCGAACGTGGCGAGAAAGGAAGGGA  
AGAAAGCGAAAGGAGCGGGCGCTAGGGCGCTGGCAAGTGTAGCGGTACGCTGCGCGTAACCACCACACC  
GCCGCGCTTAATGCGCCGCTACAGGGCGCGTTCGCGCCATTTCGCCATTCAGGCTGCGCAACTGTTGGGAAGG  
GCGATCGGTGCGGGCCTCTTCGCTATTACGCCAGCTGGCGAAAGGGGGATGTGCTGCAAGGCGATTAAGTT  
GGGTAACGCCAGGGTTTTCCAGTCACGACGTTTCTGTGAAACGGCGGTAATCATGGGCATGATTTTCGTT  
GAGTGTTTGGCTAAGAACAAGGAGGGAAACCAAGTTAGCCGCGTTTCGTATACAAGCGAGCAGTTCTCGAG  
AAGCTACTAGTTGAAGGTGCCATCGGCGATCTTTGCATCAAAGTCGACGATGCACCCCAAGTTTATTGT  
TGGTGGCCTCGCGCACTGGGTTTCGCTGTGCTGCTCAGCTCCCGTTCCATGGTCTCTTGTCTGGGATCAAGTATG  
GCGAAGGGCGCAAGAGAATGGTGCCAGTGTGGCGCGTGGATACGGGCATACCTTGGACTCCATCTCGGTAT  
AGTTCATGACAGCTGGTTGGAGCCATTGTGACACCCTGAACACGAAATCATGAGGGAGTCTTGGTTCTGG  
ACTAGGTGGTCACCTACCATTTTTGAACCTTTTCGTACGCCAGCCTTGATGTGCTAGAGTGTGAGGTTGGACA  
CGGTATCCTTGAGGCTATTGAAATCCATTGCGTAAACGTGTCTATCGCCGGAGTTGCTGGGAATTGTTCTG  
ATGGGCTAAGGTAATTTCTCTAGATCCAATCTGAGCCTCGCGGTGATGATTGCCAGACGGGCGGGATGC  
TGTGGCGACTTGGTGGTTTTTTGTTCCGGCTGATCGTTTTAGGGCGACGTTTTACGGTCTTGTGCGGATCA  
GATGGACATTGAGGTGGCCTAGCGTCAGGGTGCCGCTGAGCGCTGACCTCAACTGACGCCGTCAAAGGCCG  
ACCCCTGCGCTTGACCAACACCCTGACACCAAGAAGCCAGTGGAAACCCAGGAGGTCTGCCAAGACTTTGA  
AAGCTTGGCAGCAGCGTCTCAGCTCTTTGAAGCCTGAGTTTTAGGCAAGAATTCTGCTTGTAAATGCGCG  
GCCGGCCGACAACGCGGGGGCGGGGGAGGGGACGCTCGGCCGCCGGAGCTCGCTTCCATGCATTTTGGATG  
GAGTAAAAATTTGTTAAACACCCGACCCGACTCCGTTCCAGTGGCATCAAACACAAGCCAGTGGCATCAAAC  
ACAAGCCGCTTTTAAACATCGGAGTATACTACACACACAGCAGCTCTCAGCAGTGTGTTTTTGAAGATCGA  
ATGCTGACTTAAACACAGGCAACCTCTTACGAAGACCCGGCTTGCCGTTTTATTATTTCGGTGTAAACCAAGCG  
CTGGGACTGTGACCCGTGTACATCGAGATTTCAAACCTGCTCTGCGGTGCTGCAGTACCCGGTTATCATGG  
AACTAATTGGAAACCAAGCGGCAGGTTGAGCAAAGTCTTGCCCTGAAAGTTGGCACATTAGAGCCATCCCG  
TTTGCGGTTGCAGATGGATGAAAAACGAGCGGAATACACGGGAACAGGGCAAGGTGACCATGACATGGGCG  
AAAGGTAAGTAGCCGGGGACAGACGCAACCCGCGCACATCCCGAAAGGGGAAGTTGCGATAATCCCGTGT  
GTGACTTCTCCCTCTTCCCTCGATGATGTGCCGACGCCAACGCCATCACTTATTACGCCAGCACTGTGAT  
TCGAGCTTGCCCTGCTTCCCTGGCGTCTATGGCCTCCCGTATCCTGCTGGTGTATCATCCCAATCTGTCAAGT  
CTCATTTCCTCATTCCCATCACGATGAGGAGCCTGAGACTTTTTCGGGAAAAGAGGGGGCGTTCGATAGTT  
TGGTCCGTTTTGTGCGACGGTATTCATGTGATGTCCCTACAGTTGCATGAGACCAGGCCGCCCTGTTGTTGT  
TCATGGTTCTCTCCAGTCCCAAGGGAGCCAGGCTGGGGCGCCCCCTCCCCCTCCTTCTTTTTGTCTT  
CCACAACCTCATGACCCCCCATGCGCCTCTGCCTAAAGGTCTACCACCTACCGGACCCTCTGCTCATCAA  
GACCCCAAGATGCCCGCCCGCTTTATCGCCATACAGTAAATTGACTGTACATATAACCCGACGATAACCT

GGTTGCTGTTGGATCCAAACTCGGGCTGTCTGAGCATACAAGCGAGAAGCGTGGGTACCTCACGGCTGGTC  
GGCGCAAAGGGACGAGGTAGGTTTGTAGTGTAGCAAGGGGTTTCGGCCTTGACGCCTACAAGGGAGCAGAT  
GGAATGGGAACACCATAACAACCGAGCCCAGAACCAAGGCATCACCACATGTCTTTAGCGCAACGATATCA  
GCAAGCTCTCCGAACACATATGAAGATGGGTTCCGCTATTATGGTCCTGGCGGTGTTGAGTACTTGAGGTA  
CATATCTACCTACCTACCTACCTACCTACCTACCTACCTACCTACCTACCTACCTACCAACCAACCAACCT  
CCCCACCAACCTCTCGGGTCGGGCAGATTAACGTTGGTGGTTAAGGTGTCAAGTGTGATGTCCGGTGGT  
GGTGGTGGTGGTGGTGGTGGTGGTGGTGGTGGTGGTGGTGGTGGTGGTGGTGGTGGTGGTGGTGGTGGT  
CGAAGAGACAACCTTGACAGATGGAAGTACTAAGTAACCTCCCTAGAGCACTAGGGTTGACGTTGCAGTAAA  
AACGTGCCCCGTTTTCTTTCCCTATCTGCACTGTCCGCTGGCTGGTTGGTGGTGGTGGTGGTGGTGGTGGT  
GCGCGTGGGTCCCCTTTGGTTCGATCCACGGCGCTGGTGGTGGTGGTGGTGGTGGTGGTGGTGGTGGTGGT  
TTTAGCAGCTGCGATCGGTGAGCATCGCTGTCCCCATTCTACACTGCCATCCAAAATCAGAAAAGTGTCCCC  
CAAGTTGCTGGGGGTTCCATTGGTCTGGCGGCATCCAGATTTGCCTGCATTCTCAGCGCTGTGCTGC  
TCCTTCTTCTCCTATTTGTCTCCGTGCTGTCCGCGAATGGGTACGTTTTTTCAACGTTTTGGCCTCTGGCC  
ATGACCCTCTTCGTTTTCTGGATCGAACTTTGTTCCGTTATTAAGTACCTAGGTACCTACGTCTATGACTC  
CATCGGCCTCTCTTCCCTCCCTTCGGACTTTTGATATCCACAATTGGCAACTCTCACCGATCTCCATCTC  
GTCAACCTCCTCTCGTGCTTTGATAACGTTATACTATCTTTCTTTCTCTGTTAGCATTCAATTTGAAGAC  
ACTATCTTAATAAGCAAAAACCCTAAGACGCCATCGATCTGAACAATAAAAAGTCACCACGGAAATTGTTTAC  
CAAAAAGTGTGAAGCATATATGGCCTCATCAGCCCATTGAGAGACTACTATGTAATCAAGATCAAGACTCTT  
CTTCCATGACTTTTTGGTGGCATTGGTCTTGGGTTGGGGGTGTAATGGTCAAATAAACGGCAAGGGGGTGGT  
CAGCCTGAGCGTCGATGAAGAGCGTGATGATAAAAACCTATACGGTGAAGTTGTCGATAAAGGCGGGC  
ACATGATGGGGATTCTGGATGCCAGGTTCTCCACCTAGTCCAGGGTGTCAAAGGAAATCGGGTCCCATT  
ACTGGATCCATCCGAAGTCTCGAACATCGGGCACTCCCGTGTGTCTCTGAGTTTTCCCGATCTCAAGA  
GCTTCCCGATGCAGGCTGTGATCACAGATCCTGGCCTCGGGCTGAGACGGGATGATGGATAACCGCTGTAC  
ACTAGATACGGGACAGCAGAGCAAGCGGCACCCGGACAATGGAACAGCAGCAAGCAGTCACTCTTCAACAA  
AAAAAAAAATCAAAAAATCGAAACGGCCATGTGCGCGGCATACCACCCACAGCCTGGCTCCCGCTTTTGT  
CCATGGCTCACACAAAGACCTCCCATCTTGTCCCAGCCGTGGTCTCTTTGTGTACCCTCAGGCCACCCT  
TGCTACCTACGTACATGGAACGTGTAAGGCGTGTGTACCCTCGATTGGATCGGCCTTTGCTCTGGC  
AACTGTCTCTTTTTTTTTCTGTATGTCCCTGGCCCCCGTTGGCCTGCCCTGCCTGGCTCTTGAGCTATGG  
TGTCTCTCCATACAGGACCTGGGCATCCCAAACACCCTGGCTCCCAATGAAGGCTACGATTC  
TTGCCAGCACCTTCGCGCTGGTGGCCTCGCCCAGAGCGGTGCCTGGGGCCAATGCGGGCGTAACGGTTGG  
TCCGGCGCTACCAGCTGCATCTCCGATACGCTGCAACTACGTGAACGATTGGTATAGCCAGTGCCAGCC  
TGGTACTGCGCTCTACCACCCTGCGCGGCCACCACCTCGTCACCTCGACCAAGACCAGCCCTCCTG  
CTAGCACCACTGCCACCGCTCCGGCAAGTTCAAGTGGTTCGGTGTCAACGAGGCGCGGCGGTGAGTTT  
GGTGTGATGATCTTTCCCGGAAGATGGGGCCTGAGTTACATTCCCTGACACCAACACCCTCAGACTCT  
CCGCGAGCCAGGGTTACAACATCTTCCGTGTTGGCTTCGCCATGGAGCGCTTGTCCCCAACACCCTGACGT  
CGTCTTTGATAACGGCTATCTCACCACCTCACCCAGGTTGTCAACTCTGTTACCAACTCTGGTGCCTAT  
ATTGTTCTCGATCCCCACAATATGGCCGTTACTATGGCAAAAATCATCACCGATACCGATGCCTTCAAGAC  
TTTCTGGCAAAAATGTTGCTGCCAAGTTTGCTTCCAACCTCAAAGGTCTTTCGATACCAACAACGAGTACA  
ACACCATGGACAGACCCTTGTCTCAACCTCAACCAGGCCGCCATTGACGGTATTGTCGCGCGCGGCC  
ACTTCGAGTACATTTTCGTCGAGGGTAACCAATGGACTGGCGCCTGGTCATGGAATGTGACCAACACCAA  
TTTGGCTGCCCTTACCGATCCCGAGAACAAGATCGTCTACGAGATGCACCAGTACTCGACTCCGATAGCT  
CCGGTACCAGCACTGCCTGCGTTTTCTCCGAGATCGGTGTTTCAGCGCATTGTTGGTGGCCTGCCTGGCTC  
CGCGCCAATGGCAAAAAGGGTGTCTCGGGCAGTTTCGCTGGTGGTGGCCTCAGTCTGCAAGGCTGCCGT  
TACTGGCCTTTCTGAGCACCTCAAGGCTAACACTGACGTCTGGGAGGGTGGCCTTTGGTGGGCTGCGGGT  
CCTGGTGGGCTGACTACATGTATAGCTTTGAGCTCTTCCGGCACTGGCTATACTACTACAACAGCCTT  
CTCAAGACCTATACCCCTGGATCCGTGAGCAAGGGCGAGGAGCTGTTACCAGGGGTTGGTGGCCTCGGT  
CGAGCTGGACGGCGACGTAACCGGCCACAAGTTAGCGTGGCGGGCAGGGCGAGGGCGATGCCACCAACG  
GCAAGCTGACCCTGAAGTTCTGCAACCCGGCAAGCTGCCCGTGCCTGGCCCACCCTCGTGACCACC  
CTGACCTACGGCGTGCAGTGCTTTCAGCCGCTACCCCGACCATGAAGCAGCAGCACTTCTTCAAGTCCGC  
CATGCCCCAAGGCTACGTCCAGGAGCGACCATCTTCTTCAAGGACGACGGCACCTACAAGACCCGCGCCG  
AGGTGAAGTTTCGAGGGCGACACCCTGGTGAACCGCATCGAGCTGAAGGGCATCGACTTCAAGGAGGACGGC  
AACATCTGGGGCACAAAGCTGGAGTACAACCTTCAACAGCCACAACGTCTATATCATGGCCGACAAGCAGAA  
GAACGGCATCAAGGTGAATTTCAAGATCCGCCACAACGTGAGGACGGCAGCGTGCAGCTCGCCGACCACT  
ACCAGCAGAACACCCCATCGGGCAGCGCCCCGTGCTGTGCCCCGACAACCACTACCTGAGCACCAGTCC  
GTCCTGAGCAAAAGACCCCAACGAGAAGCGGATCACATGGTCTGCTGGAGTTCTGTGACCGCGCCGGGAT  
CACTCTCGGCATGGACGAGCTGTACAAGCATCATCACCATCACCATTAATTAATTAACACCCACCCTTCTT  
CACTGCATCGTCATCACTGTGCTTTGATGGTTGATGTGATTACGCAAACCTGATGGTTGATGAGATCACGT  
AAACTGATGTCTTTCTTAGACAGTTTGCAGGTCATGTGAATGTTATCGCCAACACATTGAATGCTAAACA

GATTACCTCCAACGCCTAGATGAAACCAAATTACCCTTGCCTTCTTTTTTTTTTACGCCGTTAATGCAGTTG  
TGATAGAGACCATGCAACGTCTTCTAAACGGAGACACAAACACATTTCGAGTCGATCAGATCGAAATGACTT  
GTTCTGTACCTCGTCACCATCCAGCCACCGTCTGAAATAGACGCAGTTGCTGGGGCTGACAGGTCCGCCT  
TCCTCGCACATATCATAGACAGGGCACCGCCACAAGGCGCCTCCATAAGGCCACTTGCCTCGGGCTCAAC  
TCCCATAAATGAGGTAACAATGCCTCCTTTGGTTGGATCATGGTCGAGGCGTCTGTTGATTGCACGTCTCG  
GATCCTGTTTGGGGATGCGCGTCACACGGTACCCCTTGCGCCATTGACCTTGACAGGCTCTACTAAGCCA  
TCGTAGTATAGCACATCCACCAACTGCTGGATATCCGCCTCGCTCAACGTCGTATTATTTCGTGATGCCGGC  
GTGGTGGATGAACTTTGCAATGTCCGACACAGTCGGGTACGACTTGTAAACGGCCGGGAGAGGCAGCAATT  
GCGGCTTGCAGGCTGGTCTTCTTGGCCGGTGCCGGTGCCGCCGTGTCTGTCGTTGGAAATCTCGCCCGC  
CTGCGCTTCGTCCCTTGGAAATATCCTCCGAGTGGGGAATGGTCCCCTGAACCACGCCCTTCTTGGGATT  
CTTTTACGCTGCTGTGCTCCTCCTCCTTGTGCTCCTACTCCTGGTACTCCAGCACCGCCGCCGTGGGAAG  
TATATGTCGATTTCTGCTTGATAAAGTCAAACACAATTTCTGTAGCTCGTTGATGAAGGCCGTTGTAAAA  
CGACGGCCAGTGAGCGCGCGTAATACGACTCACTATAGGGCGAATTGGGTACCGGGCCCCCCTCGAGGTC  
GACGGTATCGATAAGCTTGATATCGAATTCCTGCAGCCCGGGGATCCACTAGTTCTAGAGCGGCCGCCAC  
CGCGGTGGAGCTCCAGCTTTTGTCCCTTTAGTGAGGGTTAATTGCGCGCTTGGCGTAATCATGGTCATAG  
CTGTTTCTGTGTGAAATTGTTATCCGCTCACAATTCACACAACATAGGAGCCGGAAGCATAAAGTGTA  
AGCCTGGGGTGCCTAATGAGTGAGGTAACACATTAATTGCGTTGCGCTCACTGCCCGCTTTCCAGTCGG  
GAAACCTGTCTGTCAGCTGCATTAATGAATCGGCCAACGCGCGGGGAGAGGCGGTTTGGCTATTGGGCGC  
TCTTCCGCTTCCCTCGCTCACTGACTCGCTGCGCTCGGTCTGTTCCGGCTGCGGCGAGCGGTATCAGCTCACTC  
AAAGCGGTAATAACGGTTATCCACAGAATCAGGGGATAACGAGGAAAGAATGTGAGCAAAAAGCCAGC  
AAAAGGCCAGAAACCGTAAAAAGGCCGCTTGTGCTGGCTTTTTTCCATAGGCTCCGCCCTTCCAGGAGCAT  
CACAAAAATCGACGCTCAAGTCAGAGGTGGCGAAACCCGACAGGACTATAAAGATAACCAGGCGTTTCCCC  
TGGAAAGCTCCCTCGTGCCTCCTCCTGTTCCGACCCTGCCGCTTACCGGATACCTGTCCGCTTTTCTCCCTT  
CGGGAAGCGTGGCGCTTTTCTCATAGCTCACGCTGTAGGTATCTCAGTTCCGGTGTAGGTGCTTCCGCTCCAAG  
CTGGGCTGTGTGCACGAACCCCGTTCAGCCCGACCGCTGCGCCTTATCCGGTAACTATCGTCTTGAGTC  
CAACCCGGTAAGACACGACTTATCGCCACTGGCAGCAGCCACTGGTAACAGGATTAGCAGAGCGAGGTATG  
TAGGCGGTGCTACAGAGTTCTTGAAGTGGTGGCCTAACTACGGCTACACTAGAAGGACAGTATTTGGTATC  
TGCGCTCTGCTGAAGCCAGTTACCTTCGGAAGAAAGAGTTGGTAGCTCTTGATCCGGCAAACAAACCACCGC  
TGGTAGCGGTGGTTTTTTTTGTTTGAAGCAGCAGATTACGCGCAGAAAAAAGGATCTCAAGAAGATCCTT  
TGATCTTTTTCTACGGGCTGACGCTCAGTGGAAACGAAAACACGTTAAGGGATTTTGGTCATGAGATTA  
TCAAAAAGGATCTTACCTAGATCCTTTTAAATTAATAAATGAAGTTTTAAATCAATCTAAAGTATATATGA  
GTAAACTTGGTCTGACAGTTACCAATGCTTAATCAGTGAGGCACCTATCTCAGCGATCTGTCTATTTCTGTT  
CATCCATAGTTGCCTGACTCCCCGTCGTGTAGATAACTACGATACGGGAGGGCTTACCATCTGGCCCCAGT  
GCTGCAATGATACCGCGAGACCCACGCTCACGGCTCCAGTTTATCAGCAATAAACACGCGAGCCGGAAG  
GGCCGAGCGCAGAAGTGGTCTGCAACTTTATCCGCTCCATCCAGTCTATTAATTGTTGCCGGGAAGCTA  
GAGTAAGTAGTTCCGCGATTAATAGTTTGGCGAACGTTGTTGCCATTGCTACAGGCATCGTGGTGTACGCG  
TCGTCGTTTGGTATGGCTTCATTCAGCTCCGGTTCCCAACGATCAAGGCGAGTTACATGATCCCCATGTT  
GTGCAAAAAGCGGTTAGCTCCTTCCGCTCCTCCGATCGTTGTGAGAAGTAAGTTGGCCGCGAGTGTATCAC  
TCATGGTTATGGCAGCACTGCATAATTCTCTTACTGTGATGCCATCCGTAAGATGCTTTTCTGTGACTGGT  
GAGTACTCAACCAAGTCAATCTGAGAATAGTGTATGCGGCGACCGAGTTGCTCTTGGCCGGCGTCAATACG  
GGATAATACCGCGCCACATAGCAGAACTTTAAAAGTGCTCATCATTGGAAAACGTTCTTCCGGGGCGAAAAC  
TCTCAAGGATCTTACCGCTGTTGAGATCCAGTTCGATGTAACCCACTCGTGCACCCAACTGATCTTCCAGCA  
TCTTTTACTTTTACCAGCGTTTCTGGGTGAGCAAAAACAGGAAGGCAAAATGCCGCAAAAAGGGAATAAG  
GGCGACACGGAAATGTTGAATACTCATACTCTTCTTTTTTCAATATTATTGAAGCATTATCAGGGTTATT  
GTCTCATGAGCGGATACATATTTGAATGTATTTAGAAAAATAAACAATAGGGGTTCCGCGCACATTTCCC  
CGAAAAGTGCCACCTGAACGAAGCATCTGTGCTTCAATTTTGTAGAACAATAATGCAACGCGAGAGCGCTAA  
TTTTTCAAACAAGAATCTGAGCTGCATTTTTTACAGAACAGAAATGCAACGCGAAAGCGCTATTTTACCAA  
CGAAGAATCTGTGCTTCAATTTTTGTAAAAAATAAATGCAACGCGAGAGCGCTAATTTTTCAAACAAGAAT  
CTGAGCTGCATTTTTTACAGAACAGAAATGCAACGCGAGAGCGCTATTTTTACCAACAAGAATCTATACTTC  
TTTTTTGTTCTACAAAATGCATCCCGAGAGCGCTATTTTTTCTAACAAAGCATCTTAGATTACTTTTTTTC  
TCCTTTGTGCGCTCTATAATGCAGTCTCTTGATAACTTTTTGCACTGTAGGTCCGTTAAGGTTAGAAGAAG  
GCTACTTTGGTGTCTATTTTCTTCCATAAAAAAGCCTGACTCCACTTCCCGGCTTTACTGATTACTAG  
CGAAGCTGCGGGTGCATTTTTTCAAGATAAAGGCATCCCGATTATATTCTATAACCGATGTGGATTGCGCA  
TACTTTGTGAACAGAAAGTGATAGCGTTGATGATTCTTCAATGGTCAGAAAATTATGAACGGTTTTCTTCTA  
TTTTGTCTCTATATACTACGTATAGGAAATGTTTACATTTTTCGTATTGTTTTCGATTCACTCTATGAATAG  
TTCTTACTACAATTTTTTTGTCTAAAGAGTAATACTAGAGATAAACATAAAAAATGTAGAGGTCGAGTTTA  
GATGCAAGTTCAAGGAGCGAAAGGTGGATGGGTAGGTTATATAGGGATATAGCACAGAGATATATAGCAAA  
GAGATACTTTTGGCAATGTTTGTGGAAGCGGATTTCCGAATATTTTAGTAGCTCGTTACAGTCCGGTGCC

TTTTTGGTTTTTTTGAAGTGCCTCTTCAGAGCGCTTTTGGTTTTTCAAAGCGCTCTGAAGTTCCTATACTT  
TCTAGAGAATAGGAACTTCGGAATAGGAACTTCAAAGCGTTTCCGAAAACGAGCGCTTCCGAAAATGCAAC  
GCGAGCTGCGCACATACAGCTCACTGTTACGTCGCACCTATATCTGCGTGTTCCTGTATATATATATAC  
ATGAGAAGAACGGCATAGTGCCTGTTTATGCTTAAATGCGTACTTATATGCGTCTATTTATGTAGGATGAA  
AGGTAGTCTAGTACCTCCTGTGATATTATCCCATTCATGCGGGGTATCGTATGCTTCCTTCAGCACTACC  
CTTTAGCTGTTCTATATGCTGCCACTCCTCAATTGGATTAGTCTCATCCTTCAATGCTATCATTTCCTTTG  
ATATTGGATCATACTAAGAAACCATTATTATCATGACATTAACCTATAAAAAATAGGCGTATCACGAGGCC  
TTTCGTC

PVVD-WC-1 :

TCGCGCTTTTCGGTGATGACGGTGAAAACCTCTGACACATGCAGCTCCCGGAGACGGTCACAGCTTGTCTG  
TAAGCGGATGCCGGGAGCAGACAAGCCCGTCAGGGCGCTCAGCGGGTGTGGCGGGTGTGGGGCTGGCT  
TAATATGCGGCATCAGAGCAGATTGTACTGAGAGTGCACCATAACCACAGCTTTTCAATTCAATTCATCAT  
TTTTTTTTTATTCTTTTTTTTGGATTTTCGGTTTCTTTGAAATTTTTTTGATTTCGGTAATCTCCGAACAGAAG  
GAAGAACGAAGGAAGGAGCACAGACTTAGATTGGTATATATACGCATATGTAGTGTGAAGAAACATGAAA  
TTGCCAGTATTCTTAACCCAACCTGCACAGAACAAAAACCTGCAGGAAACGAAGATAAAATCATGTCGAAAAG  
CTACATATAAGGAACGTGCTGCTACTCATCCTAGTCTGTTGCTGCCAAGCTATTTAATATCATGCACGAA  
AAGCAACAAACTTGTGTGCTTCATTGGATGTTTCGTACCACCAAGGAATTACTGGAGTTAGTTGAAGCATT  
AGGTCCCAAAATTTGTTTACTAAAAACACATGTGGATATCTTGACTGATTTTTCCATGGAGGGCACAGTTA  
AGCCGCTAAAGGTCATTATCCGCAAGTACAATTTTTTACTCTTTCGAAGACAGAAAATTTGCTGACATTGGT  
AATACAGTCAAATTCAGTACTCTGCGGGTGTATACAGAATAGCAGAATGGGCAGACATTACGAATGCACA  
CGGTGTGGTGGGCCAGGTATTGTTAGCGGTTTGAAGCAGGCGGCAGAAGAAGTAACAAAGGAACCTAGAG  
GCCTTTTGTAGTGTAGCAGAATTGTCATGCAAGGGCTCCCTATCTACTGGAGAATATACTAAGGGTACTGTT  
GACATTGCGAAGAGCGCAAGATTTTTGTTATCGGCTTTATTGCTCAAAGAGACATGGGTGGAAGAGATGA  
AGGTTACGATTGGTTGATTATGACACCCGGTGTGGGTTTAGATGACAAGGAGACGCATTGGGTCAACAGT  
ATAGAACCGTGGATGATGTGGTCTCTACAGGATCTGACATTATTATTGTTGGAAGAGGACTATTTGCAAAG  
GGAAGGGATGCTAAGGTAGAGGGTGAACGTTACAGAAAAGCAGGCTGGGAAGCATATTTGAGAAGATGCGG  
CCAGCAAAACTAAAAACTGTATTATAAGTAAATGCATGTATACTAAACTCACAAATTAGAGCTTCAATTT  
AATTATATCAGTTATTACCCTATGCGGTGTGAAATACCGCACAGATGCGTAAGGAGAAAATACCGCATCAG  
GAAATTGTAAACGTTAATATTTTTGTTAAAATTCGCGTTAAATTTTTGTTAAATCAGCTCATTTTTTTAACCA  
ATAGGCCGAAATCGGCAAAATCCCTTATAAATCAAAGAATAGACCGAGATAGGGTTGAGTGTGTTCCAG  
TTTGGAAACAAGAGTCCACTATTAAGAACGTGGACTCCAACGTCAAAGGGCGAAAAACCGTCTATCAGGGC  
GATGCCCTAATACGTGAACCATCACCTAATCAAGTTTTTTGGGGTTCGAGGTGCCGTAAGCACTAAATCG  
GAACCCCTAAAGGGCCCCCGATTTAGAGCTTACGCGGGTAAAGCCGGCGAACGTTGGCAGAAAGGAAGGGA  
AGAAAGCGAAAGGAGCGGGCGCTAGGGCGCTGGCAAGTGTAGCGGTCACGCTGCGCGTAACCACCACACC  
GCCGCGCTTAATGCGCCGCTACAGGGCGCGTTCGCGCCATTCCGCATTTCAGGCTGCGCAACTGTTGGGAAGG  
GCGATCGGTGCGGGCCTCTTCGCTATTACGCCAGCTGGCGAAAGGGGGATGTGCTGCAAGGCGATTAAGTT  
GGGTAACGCCAGGGTTTTCCAGTCACGACGATTTAAATTAGATCCAATCTGAGCCTCGCGGTGATGATTG  
CCAGACGGGCGGGATGCTGTGGCGACTTGGTGGTTTTTTGTTCCGGCTGATCGCTTTCAGGGCGACGTTTCA  
CGGTCTTGTGCGGATCAGATGGACATTGAGGTGGCCTAGCGTCAGGGTGCCTGAGCGCTGACCTCAACT  
GACGCCGTTCAAGGCCGACCCTGCGCTTGACCCAACACCCTGACACCAAGAAGCCAGTGGAAACCAGGAG  
GTCTGCCAAGACTTTGAAAGCTTGGCACGAGCGTCTCAGCTCTTTGAAGCCTGAGTTTTTCAGGCAAGAATT  
CTGCTTGTAAATGCGGGGCCGGCCGACAACGCGGGGCGGGAGGGGACGCTCGGCCGCGGAGCTCGCT  
TCCATGCATTTTGGATGGAGTAAAAATTTGTTAAACACCCGACCCGACTCCGTTCTCCCTCTCGTCTCAGGT  
CTTTGTTGTGCATCCATCGCCGTGTAGCAGATTTCCATCGTTTCGTTTGTTCGGACTTTACCTTGTACTTTT  
AGCTTCATTATCATCCTACAATCATCCAGGATTTTCATCTTCCACAACCGGTACGTTATCATTTTTTACTTTTT  
GTTGCCATGTTCTTCTTGAGCCTTTTTCTGTCTAGAGGAGCTCTCCCTGCGCGCTGGGAGCTTGCCCAAAGC  
TCCAAGCTCTATCTGTGGCAGAGCTCTGAGAGCTTCCATTCCCGGGATTTCTTGGCATCAGATTCAATTCG  
AATGTCCTTTTTTCCATCCAGCTCGAGATGAGGGGTGAGGTTTGTAGTTTGGACAATACCACCACCGCCT  
TTTTGGTCCCTACCCAGACATGGCCATCAAGGTCGTTAATGCCGTCATCCCTCTTGTTCGGCTTGGGGTA  
TCGTCCATGGCTCCGCAATGTCGTCAATGGCTGCATTGACAGAGGGGGACTCCAAATGAAAGAGGCAATCG  
CAACGCTATGAAGACCAACAAGCCATATGATGGAGCCATGGGTCTACGGTCTTTGGCCCCGATGCTTTT  
GGATAGCTCTTGCAGCGCTTTAGCTGCCAACTATACACACACCCGGAATTATACGATTTAGGTGACTGCAG  
GATTAACCCTCACTAAAGGGACAGTGGCATCAAACACAAGCCAGTGGCATCAAACACAAGCCGCTTTTAAAC  
ATCGGAGTATACTACACACACACGCACTCTCAGCAGTGTGTTTTTGGAAAGATCGAATGCTGACTTAAACA  
GGCAACCTCTTACGAAGACCCGGCTTGGCGTTTATTATTCCGGTGAACCAAGCGCTGGGACTGTGCACCG  
TGTCACATCGAGATTTCAAACCTGCTCTGCGGTGCTGCAGTACCAGGTTATCATGGAACATAATTGGAAACCA  
AGCGGCAGGTTGAGCAAAGTCTTGCCCTGAAAGTTGGCACATTAGAGCCATCCCGTTTGGGTTGCAGATG

GATGAAAAACGAGCGGAATACACGGGAACAGGGCAAGGTGACCATGACATGGGCGAAAGGTAAGTAGCCGG  
GGACAGACGCAACCCGCGCACATCCCGAAAGGGGAAGTTGCGATAATCCCGTGTTGTGACTTCTCCCTCTT  
CCCTCGATGATGTGCCGACGCCAACGCCATCACTTATTACGCCAGCACTGTGATTGAGCTTGCCTGCTT  
CCTGGCGTCTATGGCCTCCCGTATCCTGCTGGTGATCATCCCAATCTGTCAAGTCTCATTTCCCTCATT  
CCCATCACGATGAGGAGCCTGAGACTTTTTCGGGAAAAGAGGGGGCGTTCGATAGTTTGGTCCGTTTTGTGCA  
CGGTATTCATGTGATGTCCCTACAGTTGCATGAGACCAGGCCGCCCTGTTGTTGTTTCATGGTTCTCTCCCA  
GTCCCAAGGGAGCCAGGCTGGGGCGCCCCCTCCCCCTCCTTCTTTTGTCTTCCACAACCTCATGACC  
CCCCATGCGCCTCTGCCTAAAGGTCTACCACCTACCGGACCTCTGCTCATCAAGACCCCCAAGATGCC  
CGCCCGCTTTATCGCCATACAGTAAATTGACTGTACATATACCCGACGATAACCTGGTTGCTGTTGGATCC  
AAACTCGGGCTGTGAGCATAACAAGCGAGAAGCGTGGGTACCTCACGGCTGGTGGCGCAAAGGGACGAG  
GTAGGTTTTGTAGTGTAGCAAGGGGTTTCGGCCTTGACGCCTACAAGGGAGCAGATGGAATGGGAACCCAT  
AACACCAGGCCAGAACCAAGGCATCACACATGTCTTTAGCGCAACGATATCAGCAAGCTCTCCGAACA  
CATATGAAGATGGGTTCCGCTATTATGGTCTGGCGGTGTTGAGTACTTGAGGTACATATCTACCTACCTA  
CCTACCTACCTACCTACCTACCTACCTACCTACCTACCTACCAACCAACCAACCTCCCCACCAACCTCTCG  
GGTCCGGCAGATTAACGTTGGTGGTTAAGGTGTCAAGTGTGATGTCCGGTGGTGGTGGTGGTGGTGGTGGT  
GTGCGCGGTGCGCATTGACAGCCGGTGCAGGGACAACCTGAAAGGAACCGAAACCGAAGAGACAACCTTGA  
CAGATGGAAGTGACTAAGTAACTCCCTAGAGCACTAGGGTTGACGTTGCAGTAAAAACGTGCCCGTTTTCT  
TTCCCTATCTGCACTGTCCGCTGGCTGGTGGTGGTGGTGGTGGTGGTGGTGGTGGTGGTGGTGGTGGTGGT  
CTTGGTTCGATCCACGGCGCTGGTGGGATCGCTGCGGATCTGGGTCCCTCGATGGTTCAGCAGCTGGGATC  
GGTCAGCATCGTCTCCCATCTACACTGCCATCAAAAACAGAAAGTGTCCCAAGTTCGTTGGGGG  
TTCCATTGGTCTTGGCGGCATCCAGATTTGCCTGCATTTACGCGCTGTGCTGCTCTTCTTCTCTCTATT  
TGTCTCCGTGCTGTCCGCAATGGGTACGTTTTTCAACGTTTTTGGCCTCTTGGCCATGACCCTCTTCGGTT  
TCTGGATCGAACTTTGTTCCGTTATTAAGTACCTAGGTACCTACGCTATGACTCCATCGGCCTCTCTTTC  
CTCCCTTCGGACTTTTGCATATCCACAATTGGCAACTCTCACCGATCTCCATCTCGTCAACCTCCTCTCGT  
GCTTTGATAACGCTTATACTATCTTTCTCTTCTGTTAGCATTCAATTTGAAGACACTATCTTAATAAGCA  
AAAACCTAAGACGCCATCGATCTGAACAATAAAAGTACCACGGAATTGTTACCAAAAAGTGTGAAGCAT  
ATATGGCATCATCAGCCATTGAGAGACTACTATGTAATCAAGATCAAGACTCTTCTTCCATGACTTTTTGG  
TGCCATTGGTCTTGGGTTGGGGGTGTAATGGTCAAATAAACGGCAAGGGGGTGGTCCAGCCCTGAGCGTCA  
TGAAGAGCGTGATGATAAAAACCTATACGGTGCAAGTTGTGATAAAGACGGGGCACATGATGGGGATTCT  
TGGATGCCAGGGTCTTCCACCTAGTCCAGGGTGTCAAAGGAAATGCGGTCCCATTAAGTCCATCCGAA  
CTGCTCGAACATCGGGCCACTCCCGTTGTGTCTCTGAGTTTCCCGATCTCAAGAGCTTCCCGATGCAGGC  
TGTGATCACAGATCTGGCCTCGGCGCTGAGACGGGATGATGGATAACCGCTGTACACTAGATAACGGACAG  
CAGAGCAAGCGGCACCCGGACAATGGAACAGCAGCAAGCAGTCACTCTTCAACAAAAAAAATAACAAAA  
ATCGAAACGGCCATCTCGCCGGCATAACCACCCAGCAGCCTGGCTCCCGCGTTTTGTCCATGGCTCACAAAA  
GACCTCCCATCTCTTGTCCAGCCGTGGTCTCTTTGTGTACCCTCAGGCCACCCTTGCTACCTACGTACAT  
GGAACGTGTAAGGCGTGTGATACCCTGATTGGATCGGCGTCTTGTCTCTGGCAACTGTCTCTCTTTTTT  
TTCTGTATGTCCCTGGCCCCCGTTGGCCTGCCCTGCCTGGCTCTTGAGCTATGGTGTCTCTCCATACAGG  
ACCCTGGGCATCCCAAACACCCCTGGCTCCCACTTCAAAAATGAACAACAACACTACTACGGTTCCCGCTGTC  
TCCTGAGGAGCTTCCAGCATCAAATGCACCAGCACCAGCAGCAGCAGCAACAACAACAACAACAACAGC  
AGCAGCAGCAGCAGCAACAACAACAACAGCAACAACAGCAACAACAGCATCAGCATCAGCAGCAACAACAAA  
ACCAATCAGCATCGCAATGCCGGCATGATGAATACGCCTCAAATAACAATCAAGGAAACAGCAGATTCA  
CGCTTCAGATGTAACCATGTCCAGGAGGAAGCGACTCTCTTGATGAAATCATCCAGCAGAACCTCGACGAAA  
TGCATCGAAGGCGGAGTGTCCCCAGCCCTATGGGGGCCAGACTAGGAGGTTGTCCATGTTTGGATTACGCG  
AACCCCAACGATGGTTTTCTCGGACTATCAACTCGATAATATGTGAGGAAATTACGGGGACATGACTGGCGG  
CATGGGCATGTCCAGGCCTCGAGCCCGTATGCAGGGCAGAAACATCATGGCCATGTCCGACCACAGCGGTG  
GATACTCGCACATGTCCGCAATGTTATGGGCAACATGATGACTTACCCCAACCTCAACATGTACCCTCT  
CCCCGATCGAGAACCCTATTCTTTCGGCCGGACTCGACACTATTTCGCACCGATTTTTTCCATGGACATGAA  
CATGGATAGTGGCTCCGTGAGCGCAGCCAGCGTACATCCACCCCTGGGCTTAATAAGCAGGACGACGAGA  
TGATGACCATGGAGCAGGGCTTTGGTGGAGGTGACGATGCCAACGCCTCTCACAGGCCCAACAAAACATG  
GGCGGTTTTGACTCCGGCCATGACTCCGGCCATGACCCCTGCAATGACCCCGGGTGTGAGCAACTTTGCACA  
AGGCATGGCTACACAGTCTCACAGGATGCGGCAAGCACACCCCGGACAACCTTCCAGTCTCCGTCTTAT  
CCGCAACAACACAGACAATACGAATTGGGCCGCCGCCACCAGCGAGCGTCACCAATGCCCCACCCAGCG  
CCATTTACCTCGACGCCGTGAGTGGAGGAGCGTCCAGACAAAGAGCATTTACTCCAAAAGCGGTTTTGCA  
CATGCTGAGGGCGTTGTGGTATGTGGCATCGAGGAAGGACCCAAAGCTTAAGCTCGGTGCCGTGGACATGT  
CTTGTGCATTTGTGCTGTGATGTAACACTCAACGATTGCCCATCATTTATGTGTCCGATAACTTCCAA  
AACCTCACGGGCTATAGTCGCCACGAGATTGTGGGGCGGAACTGCCGCTTCTTGCAGGCCCCCGACGGTAA  
TGTGGAGGCTGGCACCAAGCGCAATTTGTGAAAACAACGCCGTATATACGCTCAAGAAGACCATCGCGG  
AGGGCCAGGAGATTACGACAGATCTGATCAATTATCGGAAGGGCGCAAGCCTTCTGAAATTTGTTGACC

ATGATTCCCATTCCCTGGGATACCGAAGAAATCCGTTATTTTCATTGGATTTTCAGATCGATCTCGTGGAAATG  
CCCTGATGCCATAATCGGCCAGGAAGGAAATGGGCCCATGCAGGTCAACTATAACCCACAGCGATATCGGGC  
AGTACATCTGGACGCCACCTACCCAGAAGCAACTGGAGCCTGCCGACGGCCAGACTTTGGGCGTTGATGAT  
GTTTCGACACTTTTTCAGCAATGTAATTCGAAGGGTGTTCATCCGACTGGCACAACAATCCTGGGATAA  
GATGCTTTTGGAGAACGCAGACGATGTTGTCCATGTGTTGTGCTCAAGGGTCTCTTCTTATACCTATCTC  
CGGCCTGTAAGAAAGTGTGGAGTACGATGCCAGCGACCTCGTTGGGACCTCGCTGTCTCGATTTGCCAC  
CCGTCCGACATCGTGCCGGTGACGAGGGAGTTGAAAGAGGCCAGCAACACACTCCAGTCAATATAGTCTT  
CAGAATTCGGAGAAAAGAACAGTGGTTATACCTGGTTTGAAGCCACGGAACATTGTTCAACGAACAGGGTA  
AGGGTCGCAAGTGTATCATTCTTGTGGGGAGAAAACGCCCGTTTTTGTCTACACAGAAAGGACCTCGAA  
CTCAACGGCGGTATTGGTGACAGCGAAATTTGGACCAAGGTCTCGACATCAGGCATGTTCTTGTTCGTTTC  
GTCGAATGTCCGGTGCCTCCTGGATTTGTCCCGGAGAACCTCCAAGGTACCAGCATGCAAGATCTCATGC  
GCAAGGAATCCAGAGCCGAGTTTGGGAGGACGATAGAGAAAGCTAGAAAGGGCAAGATCGCGAGCTGCAAG  
CATGAGGTGCAAAAACAAGCGTGGCCAGGTGCTCCAGGCCTATACAACATTCTACCCCGGAGATGGTGGTGA  
GGGTCAAAGGCCAACGTTTTTGTGGCGCAAACAAGCTGTTGAAGGCGTCATCAAGGACACTAGCTCCCG  
CGACCGTAACGGTCAAGAATATGTCTCCGGGCGGTGTTCTTTGTGCGCAATGAAAGGGATCCAGACCGAC  
AGTGATAGCAACACTCTCATGGGCGGGATGTCGAAGTCGGGAAGCAGCGATAGTACGGGGGCCATGGTCTC  
AGCTCGTAGCAGTGCAGGACCCGGCCAGGATGCGGGTTTTGGACGCCGATAACATATTTGACGAACTCAAGA  
CAACGCGTTGCACCAGCTGGCAGTACGAGCTGAGGCAAATGGAGAAGGTGAATCGCATGTTGGCCGAAGAG  
CTGGCGCAGCTTTTGTCTAACAAGAAAAACGGAAACGAAGAAAGGGAGGAGGTAACATGGTGAGGGATTG  
TGCAAATTTGCCATACGAGGAACACGCCGAATGGCGCGTGGCCAAAGCGGGAATCGAGATCTATGCAACA  
GTTGTGGTTGAGATGGGCAAAGCAGACTGGGCGGTATCGCCGCGCACCTCATCCGAGGTGGGAATGGT  
GATTCGATGAGCAAGAAGAGCAATTCACCTAGTCACTCGTCGCCCTTCATCGAGAAGTCGGCAACGATTC  
ACCGTCTACTACCACCGCTACCAAGAACTCACCTCTCTTTCGAGGAAGTAGCACCCTGCACCCGGTACGA  
TCACAACGGACAGCGGACCAGCAGTGCATCGAGCGCTAGTGAACCGGTAGTACGACTATAGCTACTTCA  
GCCAATTCTGCTGCATCAACCGTCAACGCCCTGGGCCCTCTGCGACAGGTCCCAGTGGCGGCTCACCGGC  
TCAACATCTTCCGCTCATCTCCAGGGAACACACCTTAACGCCAGGCCATGCAGCGTGTACACCAGCATA  
AGCAGCATCAGCAGCATCAACAGCAGCATCAACAGCAGCATCAACAGCAGCATCAACAGCAGCACC AACAG  
CTTCAGCAGCATCAGTTCAACCTCCACAAAGCCAGCCACTCCTGGAAGGCGGAAGCGGTTTTCCGTGGAAG  
CGGAATGGAGATGACCTCAATTAGGGAAGAGATGGGCGAACATCAACAGGGCTTAAGTGTAGGTAAGCCTA  
TCCCTAACCTCTCCTCGGTCTCGATTCTACGTAAGGCGGGGAGTTAAGAATGGAGAGAGGAAAAAGAAA  
GGGGGAGAGCGAAAGAGAAGTGGGACGAGAGGCAACAGTACAGCACCTCCATGGCGCAATCACAACAAC  
TACAACCACAACAAGATCAACATCAACATCAACATCGACAACAAGGGGTGGGAATCAGACAACGATGTCA  
TCTGGCATACTCGCGGCTTTGAGGGTTTTACTTTTTATGTTTTGTCTATTCCGGGGTTTTCTCATGTTTGT  
AAGGGATCAGATCAACATCATTGCGAAAGGCGCTTTATTCTGCGATTGGGCATGGCGATGAGATGGTCT  
TTAATTTTTTATCCTCATATTCCCCATATATACACTACATCATTACAATCATGGGTTTTCTTCACTTCCGT  
CGTTCTTAAAGACAAAGTGTGGTTTTTTATTTACCGCATCACCTACTCTTACATTATCATCTGTCAAG  
ATGACAGAGCGGCATTCTGGCCCTCCTTTAGATCTTCATCTACAGGTTGCTTTGAATAAGGCAAATTTGCAA  
GAGAATTGGATCTTTTCGATGAGGCGCTCTTCCATCGGCTTTTACGTTATGATGCGGGAAGCAAGCAGGCAG  
GCTTGTGGGTGGGAATGGACTGGCAGAAGCGGTAGGAGAGAGTTATGAGTCTCGCAAATCAAGGAAGGGC  
CCGAGGATACAAGAGAGAGAACCGGATGACTATTGTTGCTACCGCGAGGCCACAAGGTTTTGGATTAGAAC  
AGTTATTCGAGTGGGACACTGCAATGAATTAGGTACATATCATTCTGCCAAATATGAAACCGGAATTTCTG  
CAAACACCGAAATATCAACAGAAGGAAATCCTATCTACTTCCATCAATGGACAAGCAGCGCTTAAACTATA  
TCACTGTGCCATTGTACACGCAACAGAGAGCGTTCATCAAAGGGCTGATCAATGATTTAAAGACGCAAAC  
CGTTTTGACATTCAACTTTTCTTGGACCGTCCATCATTCCGTCTAGTCTCACTAGAGGATCCGACACTATA  
GAATACCTATTCTCGTACTATGCATTACATGTTAATTATTACATGCTTAACGTAATTC AACAGAAATTAT  
ATGATAATCATCGAAAGACCGGCAACAGGATTC AATCTTAAGAAACTTTATTGCCAAATGTTTGAACGATC  
TGCAGGTCGACGGATCAGATCTCGGTGACGGGCAGGACCGGACGGGGCGGTACCGGCAGGCTGAAGTCCAG  
CTGCCAGAAACCCACGTATGCCAGTTCCTGCTTGAAGCCGGCCGCCGCGCAGCATGCCGCGGGGGGCAT  
ATCCGAGCGCCTCGTGCATGCGCACGCTCGGGTCTGTTGGGACGCCGATGACAGCGACCACGCTCTTGAAG  
CCCTGTGCCTCCAGGGACTTCAGCAGGTGGGTGTAGAGCGTGGAGCCAGTCCCGTCCGCTGGTGGCGGGG  
GGAGACGTACACGGTCTGACTCGGCCGTCCAGTCTGAGGCGTTGCGTGCCTTCCAGGGGCCGCGTAGGCGA  
TGCCGGCGACCTCGCCGTCCACCTCGGCGACGAGCCAGGGATAGCGCTCCCGCAGACGGACGAGGTCTGTC  
GTCCACTCCTGCGGTTCTGCGGCTCGGTACGGAAGTTGACCGTGTCTGCTCGATGTAGTGGTTGACGAT  
GGTGCAGACCGCCGGCATGTCCGCTCGGTGGCACGGCGGATGTCCGGCCGGGCGTCTGTTCTGGGCTCATGG  
TTACTTCTTAATCGAAGCTTTGCTTGGGTAGAATAGGTAAGTCAGATTGAATCTGAAATAAAGGGAGGAAG  
GGGCAACTTAAGAAGGTATGACCGGGTCTTCACTTACCTTGTGTTGACAAACGCACCAAGTTATCGTGCAC  
CAAGCAGCAGATGATAATAATGTCTCCTGCTGCTGCTAATAAGAGTCACACTTCGAGCGCCGCGCTA  
CTGCTACAAGTGGGGCTGATCTGACCAGTTGCCTAAATGAACCATCTTGTCAAACGACACAAATTTTGTGC



TCACCGCCTGGACGACTAAACCAAAATAGGCATTTCATTGTTGACCTCCACTAGCTCCAGCCAAGCCCCAAA  
AGTGCTCCTTCAATATCATCTTCTGTGAGTCTAGATGACTTGTTCCTGTACCTCGTCACCATCCAGCCAC  
CGTCTGAAATAGACGCAGTTGCTGGGGCTGACAGGTCCGCTTCTCGCACATATCATAGACAGGGCACCG  
CCCACAAGGCGCCTCCATAAGGCCACTTGCACCTCGGCTCAACTCCCATAAATGAGGTAACAATGCCTCCTT  
TGGTTGGATCATGGTTCGAGGCGTTCGTTGATTGCACGTCTCGGATCCTGTTTGGGGATGCGCGTCACACGG  
TACCCCTTGGCGCCATTGACCTTGCAGGCTCTACTAAGCCATCGTAGTATAGCACATCCACCAACTGCTG  
GATATCCGCCTCGCTCAACGTCTGATTATTTCGTGATGCCGGCGTGGTGGATGAACTTTGCAATGTCCGACA  
CAGTCGGGTACGACTTGTAAACCGCCGGGAGAGGCAGCAATTGCGGCTTGCCTGGGCTTGGCTTCTTGGCC  
GGTGCCGGTGCCTCGTCTGTTGAAATCTCGCCCGCTGCGCTTCTGCTCCCTTGGAAATATCCTC  
CGAGTGGGGAATGGTCCCCTGAACCACGCCCTTCTTGGGATTCTTTTACGCTGCTGTGCTCCTCCTCCTT  
GTGCTCCTACTCCTGGTACTCCAGCACCGCCCGCTGGGAAGTATATGTCGATTTCTGCTTGATAAAGTCA  
AACACAATTTCTGTAGCTCGTTGATGAAGGCCGTGTCGAGCTCGCCCTCAGTAAACCAGGGGCCACCTGT  
GGCGCGATCGGAGGGACGTAGGTTTCGCTTGTATGTACATCTTCTTGTGGGGTGTCTCGACGTTCTTCATGC  
TGGCGATGTAGCCCTTTTGTCTGAGATACTTGTATGCAATGCTTCATAAGCGAGTCGGCCATGTTGAGCTTG  
TTCTTGTATGGTCCGGTTCAGATGCCGTCCGCCCCGGCTTCTGTCGACCATGGCGTATACCATCATTATTTT  
GGAGTTGGGGAGGGAGGTGTACCTTTTGGGAGGAAGGGGAGGTTAGTTGGTGTGCTCATTTAAATGCTGTT  
TCCTGTGTGAAATTGTTATCCGCTCACAATTTCCACACAACATAGGAGCCGGAAGCATAAAGTGTAAAGCCT  
GGGGTGCCTAATGAGTGAGGTAACCTCACATTAATTGCGTTGCGCTCACTGCCCGCTTTCCAGTCGGGAAAC  
CTGTCTGTCAGCTGCATTAATGAATCGGCCAACGCGCGGGGAGAGGCGGTTTGCATTTGGGCGCTCTTC  
CGCTTAATCTCGCTCACTGACTCGCTGCGCTCGGCTCGGCTGCGGCGAGCGGTATCAGCTCACTCAAAGG  
CGGTAACACGGTTATCCACAGAATCAGGGGATAACGCAAGAAAGAATGTGAGCAAAAAGGCCAGAAAAG  
GCCAGGAACCGTAAAAAGGCCGCTTGTGGCGTTTTTTCATAGGCTCCGCCCCCTGACGAGCATCACAA  
AAATCGACGCTCAAGTCAGAGGTGGCGAAACCCGACAGGACTATAAAGATACCAGGCGTTTTCCCCCTGGAA  
GCTCCCTCGTGCCTCTCCTGTTCCGACCCTGCCGCTTACCGGATACCTGTCCGCCTTTCTCCCTTCGGGA  
AGCGTGGCGCTTTCTCATAGCTCACGCTGTAGGTATCTCAGTTCGGTGTAGGTGCTTCGCTCCAAGCTGGG  
CTGTGTGCACGAACCCCCGTTTCCAGCCGACCCTGCGCTTATCCGGTAACTATCGTCTTGAGTCCAACC  
CGGTAAGACACGACTTATCGCCACTGGCAGCAGCCACTGGTAACAGGATTAGCAGAGCGAGGTATGTAGGC  
GGTGTACAGAGTTCTTGAAGTGGTGGCCTAACTACGGCTACACTAGAAGGACAGTATTTGGTATCTGCGC  
TCTGCTGAAGCCAGTTACCTTTCGGAAAAAGAGTTGGTAGCTCTTGATCCGGCAAACAAACCACCGCTGGTA  
GCGGTGGTTTTTTTTGTTTGAAGCAGCAGATTACGCGCAGAAAAAAGGATCTCAAGAAGATCCTTTGATC  
TTTTCTACGGGGTCTGACGCTCAGTGGAACGAAAACCTCACGTTAAGGGATTTTGGTTCATGAGATTATCAAA  
AAGGATCTTACCTAGATCCTTTTAAATTAATAATGAAGTTTTAAATCAATCTAAAGTATATATGAGTAAA  
CTTGGTCTGACAGTTACCAATGCTTAATCAGTGAGGACCTATCTCAGCGATCTGTCTATTTCTGTTTATCC  
ATAGTTGCTGACTCCCCGTCGTGTAGATAACTCAGTACCGGGAGGGCTTACCATCTGCCCCCAGTGTGC  
AATGATACCGCGAGACCCACGCTCACCGGCTCCAGATTTATCAGCAATAAACCAGCCAGCCGGAAGGGCCG  
AGCGCAGAAGTGGTCTGCAACTTTATCCGCCTCCATCCAGTCTATTAATTGTTGCCGGAAGCTAGAGTA  
AGTAGTTCGCCAGTTAATAGTTTGGCGAACGTTGTTGCCATTGCTACAGGCATCGTGGTGTACGCTCGTC  
GTTTGGTATGGCTTCATTACGCTCCGGTTCACCAACGATCAAGGCGAGTTACATGATCCCCCATGTTGTGCA  
AAAAAGCGGTTAGCTCCTTCGGTCTCCGATCGTTGTGAGAAGTAAGTTGGCCGAGTGTATCACTCATG  
GTTATGGCAGCACTGCATAATTCTCTTACTGTATGCCATCCGTAAGATGCTTTTTCTGTGACTGGTGAGTA  
CTCAACCAAGTCATTCTGAGAATAGTGTATGCGGCGACCGAGTTGCTCTTGCCCGGCGTCAATACGGGATA  
ATACCGCGCCACATAGCAGAACTTTAAAGTGCTCATCATTGGAAAACGTTCTTCCGGGGCGAAAACCTCTCA  
AGGATCTTACCGCTGTTGAGATCCAGTTCGATGTAACCCACTCGTGCACCCAACCTGATCTTCAGCATCTTT  
TACTTTACCAGCGTTTCTGGGTGAGCAAAAACAGGAAGGCAAAATGCCGCAAAAAGGGGAATAAGGGCGA  
CACGGAATGTTGAATACTCATACTCTCTTTTTCAATATTATTGAAGCATTATCAGGGTTATTGTCTC  
ATGAGCGGATACATATTTGAATGTATTTAGAAAAATAAACAATAGGGGTTCCGCGCACATTTCCCCGAAA  
AGTGCCACCTGAACGAAGCATCTGTGCTTCATTTTGTAGAACAATAAATGCAACGCGAGAGCGCTAATTTTT  
CAAACAAGAATCTGAGCTGCATTTTTACAGAACAGAAATGCAACGCGAAAGCGCTATTTTTACCAACGAAG  
AATCTGTGCTTCATTTTTGTAAAACAAAATGCAACGCGAGAGCGCTAATTTTTCAAACAAGAATCTGAG  
CTGCATTTTTACAGAACAGAAATGCAACGCGAGAGCGCTATTTTTACCAACAAGAATCTATACTTCTTTTT  
TGTTCTACAAAATGCATCCCAGAGCGCTATTTTTCTAACAAAGCATCTTAGATTACTTTTTTCTCCTT  
TGTGCGCTCTATAATGCAGTCTCTTGATAACTTTTTGCACTGTAGGTCCGTTAAGGTTAGAAGAAGGCTAC  
TTTGGTGTCTATTTTTCTTCCATAAAAAAGCCTGACTCCACTTCCCGGTTTTACTGATTACTAGCGAAG  
CTGCGGGTGCATTTTTTCAAGATAAAGGCATCCCCGATTATATTCTATACCGATGTGGATTGCGCATACTT  
TGTGAACAGAAAGTGATAGCGTTGATGATTCTTCATTGGTTCAGAAAATTATGAACGGTTTTCTTCTATTTT  
TCTCTATATACTACGTATAGGAAATGTTTACATTTTCGTATTGTTTTCGATTCACTCTATGAATAGTTCTT  
ACTACAATTTTTTGTCTAAAGAGTAATACTAGAGATAAACATAAAAAATGTAGAGGTGAGTTTAGATGC  
AAGTTCAAGGAGCGAAAGGTGGATGGTAGGTTATATAGGGATATAGCACAGAGATATATAGCAAAGAGAT

ACTTTTGGAGCAATGTTTGTGGAAGCGGTATTTCGCAATATTTTAGTAGCTCGTTACAGTCCGGTGCCTTTTT  
GGTTTTTTGAAAGTGCCTTTTCAGAGCGCTTTTGGTTTTTCAAAGCGCTCTGAAGTTCCCTATACTTTCTAG  
AGAATAGGAACTTCGGAATAGGAACTTCAAAGCGTTTTCCGAAAACGAGCGCTTCCGAAAATGCAACGCGAG  
CTGCGCACATACAGCTCACTGTTTCACGTGCGACCTATATCTGCGTGTTCCTGTATATATATATACATGAG  
AAGAACGGCATAGTGCCTGTTTATGCTTAAATGCGTACTTATATGCGTCTATTTATGTAGGATGAAAGGTA  
GTCTAGTACCTCCTGTGATATTATCCCATTCCATGCGGGGTATCGTATGCTTCCTTCAGCACTACCCTTTA  
GCTGTTCTATATGCTGCCACTCCTCAATTGGATTAGTCTCATCCTTCAATGCTATCATTTTCTTTGATATT  
GGATCATACTAAGAAACCATTATTATCATGACATTAACCTATAAAAATAGGCGTATCACGAGGCCCTTTTCG  
TC

PVVD-GFP :

TCGCGCGTTTTCCGGTGATGACGGTGAAAACCTCTGACACATGCAGCTCCCGGAGACGGTCACAGCTTGTCTG  
TAAGCGGATGCCGGGAGCAGACAAGCCCGTCAGGGCGCGTCAGCGGGTGTGGCGGGTGTGGGGCTGGCT  
TAACTATGCGGCATCAGAGCAGATTGTACTGAGAGTGCACCATAACCACAGCTTTTTCAATTCATTCATCAT  
TTTTTTTTTATTCTTTTTTTTTGATTTTCGGTTTTCTTTGAAATTTTTTTGATTTCGGTAATCTCCGAACAGAAG  
GAAGAACGAAGGAAGGAGCACAGACTTAGATTGGTATATATACGCATATGTAGTGTGAAGAAACATGAAA  
TTGCCAGTATTCTTAACCCAACCTGCACAGAACAAAACCTGCAGGAAACGAAGATAAATCATGTCGAAAAG  
CTACATATAAGGAACGTGCTGCTACTCATCTAGTCTGTGCTGCCAAGCTATTTAATATCATGCACGAA  
AAGCAAACAAACTTGTGTGCTTCATTGGATGTTTCGTACCACCAAGGAATTACTGGAGTTAGTTGAAGCATT  
AGGTCCTAAAATTTGTTTACTAAAAACACATGTGGATATCTTGACTGATTTTTTCCATGGAGGGCACAGTTA  
AGCCGCTAAAGGCATTATCCGCCAAGTACAATTTTTTACTCTTCAAGACAGAAAATTTGCTGACATTGGT  
AATACAGTCAAATTCAGTACTCTGCGGGTGTATACAGAATAGCAGAATGGGCAGACATTACGAATGCACA  
CGGTGTGGTGGGCCAGGTATTGTTAGCGGTTTTGAAGCAGGCGGCAGAAGAAGTAACAAAGGAACCTAGAG  
GCCTTTTGTATGTTAGCAGAATTGTCATGCAAGGGCTCCCTATCTACTGGAGAATATACTAAGGGTACTGTT  
GACATTGCGAAGAGCGACAAAGATTTTTGTTATCGGCTTTATTGCTCAAAGAGACATGGGTGGAAGAGATGA  
AGGTTACGATTGGTTGATTATGACACCCGGTGTGGGTTTTAGATGACAAGGGAGACGCATTGGGTCAACAGT  
ATAGAACCGTGGATGATGTGGTCTCTACAGGATCTGACATTATTATTGTTGGAAGAGGACTATTTGCAAAG  
GGAAGGGATGCTAAGGTAGAGGGTGAACGTTACAGAAAAGCAGGCTGGGAAGCATATTTGAGAAGATGCGG  
CCAGCAAAACTAAAAACTGTATTATAAGTAAATGCATGTATACTAAACTCACAAATTAGAGCTTCAATTT  
AATTATATCAGTTATTACCCTATGCGGTGTGAAATACCGCACAGATGCGTAAGGAGAAAATACCGCATCAG  
GAAATTTGTAACGTTAATATTTTTGTTAAAAATTCGCGTTAAATTTTTGTTAAATCAGCTCATTTTTTAACCA  
ATAGGCCGAAATCGGCCAAAATCCCTTATAAATCAAAGAATAGACCGAGATAGGGTTGAGTTGTTCCAG  
TTTGAAGCAAGAGTCCACTATTAAGAAGCTGGACTCCAACGTCAAAGGGCGAAAACCGTCTATCGGGC  
GATGGCCCACTACGTGAACCATCACCTAATCAAGTTTTTTGGGGTCGAGGTGCCGTAAGCACTAAATCG  
GAACCCTAAAGGGAGCCCCGATTTAGAGCTTGACGGGAAAGCCGGCGAACGTGGCGAGAAAGGAAGGGA  
AGAAAGCGAAAGGAGCGGGCGCTAGGGCGCTGGCAAGTGTAGCGGTACAGCTGCGCGTAACCACCACACC  
GCCGCGCTTAATGCGCCGCTACAGGGCGCGTCGCGCCATTCCGCAATTCAGGCTGCGCAACTGTTGGGAAGG  
GCGATCGGTGCGGGCCTCTTCGCTATTACGCCAGCTGGCGAAAGGGGGATGTGCTGCAAGGCGATTAAGTT  
GGGTAACGCCAGGGTTTTCCAGTCACGACGATTTAAATTAGATCCAATCTGAGCCTCGCGGTGATGATTG  
CCAGACGGGCGGGATGCTGTGGCGACTTGGTGGTTTTTTGTTTCGGGCTGATCGCTTTTCAGGGCGACGTTTCA  
CGGTCTTGTGCGGGATCAGATGGACATTGAGGTGGCCTAGCGTCAGGGTGCCTGAGCGCTGACCTCAACT  
GACGCCGTCCAAGGCCGACCCCTGCGCTTGACCCAACACCCTGACACCAAGAAGCCAGTGAACCCAGGAG  
GTCTGCCAAGACTTTGAAAGCTTGGCACGAGCGTCTCAGCTCTTTGAAGCCTGAGTTTTTCAGGCAAGAATT  
CTGCTTGTAAATGCGGGGCGGGCCGACAACGCGGGGCGGGGAGGGGACGCTCGGCCGCGGAGCTCGCT  
TCCATGCAATTTGGATGGAGTAAAAATTTGTTAAACACCCGACCCGACTCCGTTCTCCCTCTCGTCTCAGGT  
CTTTGTTGTGCATCCATCGCCGTGTAGCAGATTTCCATCGTTTCGTTTGTTCGGACTTTACCTTGTACTTTTT  
AGCTTCATTATCATCCTACAATCATCCAGGATTTTCATCTTCCACAACCGGTACGTTATCATTTTTTACTTTTT  
GTTGCCATGTTCTTCTTGGAGCCTTTTTCTGTCTAGAGGAGCTCTCCCTGCCGGCTGGGAGCTTGCCCAAAGC  
TCCAAGCTCTATCTGTGGCAGAGCTCTGAGAGCTTCCATTCCCGGGATTTCTTGGCATCAGATTCAATTCG  
AATGTCCTTTTTTCCATCCACGCTCGAGATGAGGGGTGAGGTTTTGTTAGTTTGACAATACCACCACCGCCT  
TTTGGTCCCTACCCAGACATGGCCATCAAGGTCGTTAATGCCGTCCATCCCTCTTGTTCGGCTTGGGGTA  
TCGTCCATGGCTCCGCAATGTCGTCAATGGCTGCATTGACAGAGGGGGACTCAAATGAAAGAGGCAATCG  
CAACGCTATGAAGACCAACAAGCCATATGATGGAGCCATGGGTCTACGGTCTTTTGGCCCCGGATGTCTTT  
GGATAGCTCTTGGCAGCGCTTTAGCTGCCAACTATACACACACCCGGAATTATACGATTTAGGTGACTGCAG  
GATTAACCCTCACTAAAGGGACAGTGGCATCAAACACAAGCCAGTGGCATCAAACACAAGCCGTCTTTAAC  
ATCGGAGTATACTACACACACACGCACTCTCAGCAGTGTGTTTTTGGAAAGATCGAATGCTGACTTAACACA  
GGCAACCTCTTACGAAGACCCGGCTTGGCGTTTTATTATTCCGGTGTAAACCAAGCGCTGGGACTGTGCACC

TGTCACATCGAGATTTCAAAGTCTCTGCGGTCTGTCAGTACACCGTTATCATGGAACATAATTGGAAACCA  
AGCGGCAGGTTGAGCAAAGTCTTGCCTGAAAGTTGGCACATTAGAGCCATCCCGTTTGCAGTTGCAGATG  
GATGAAAAACGAGCGGAATACACGGGAACAGGGCAAGGTGACCATGACATGGGCGAAAGGTAAGTAGCCGG  
GGACAGACGCAACCCGCGCACATCCCGAAAGGGGAAGTTGCGATAATCCCGTGTGTGACTTCTCCCTCTT  
CCCTCGATGATGTGCCGACGCCAACGCCATCACTTATTCACGCCAGCACTGTGATTCGAGCTTGCCTGCTT  
CCTGGCGTCTATGGCCTCCCGTATCCTGCTGGTGATCATCCCAATCTGTCAAGTCTCATTTCCTCCCTCATT  
CCCATCACGATGAGGAGCCTGAGACTTTTCGGGAAAAGAGGGGGCGTCGATAGTTTGGTCCGTTTTGTCTGA  
CGGTATTTCATGTGATGTCCCTACAGTTGCATGAGACCAGGCCGCCCTGTGTGTTGTTTCATGGTTCTCTCCCA  
GTCCCAAGGGAGCCAGGCTGGGGCGCCCCCTCCCCCCTCCTTCTTTTTGTCTTCCACAACCTTCATGACC  
CCCCATGCGCCTCTGCCTAAAGGTCTACCACCTACCGGACCCTCTGCTCATCAAGACCCCCAAGATGCC  
CGCCCGCTTTATCGCCATACAGTAAATTGACTGTACATATACCCGACGATAACCTGGTTGCTGTTGGATCC  
AAACTCGGGCTGTGAGCATAACAAGCGAGAAGCGTGGGTCACTCACGGCTGGTGGCGCAAAGGGACGAG  
GTAGGTTTTGTAGTGTAGCAAGGGGGTTTCGGCCTTGACGCCTACAAGGGAGCAGATGGAATGGGAACCCAT  
ACAACCCGAGCCCAGAACAAGGCATCACCATATGCTTTAGCGCAACGATATCAGCAAGCTCTCCGAACA  
CATATGAAGATGGGTTCCGCTATTATGGTCTTGGCGGTGTTGAGTACTTGAGGTACATATCTACCTACCTA  
CCTACCTACCTACCTACCTACCTACCTACCTACCTACCAACCAACCAACCTCCCACCAACCTCTCG  
GGTCCGGCAGATTAACGTTGGTGGTTAAGGTGTCAAGTGTGCTATGTCCGGTGGTGGTGGTGGTGGTGGTGG  
GTGGCGGGTGGCATTGACAGCCGGTGGCGGACAACCTGAAAGGAACCGAAACCGAAGAGACAACCTTGA  
CAGATGGAAGTGTGACTAAGTAACCTCCCTAGAGCACTAGGGTTGACGTTGCAGTAAAAACGTGCCCGTTTTCT  
TTCCTATCTGCATGCTCCGCTGGCTGGTTGGTGGCGTTTCAATTGTTGCTGGTGGCGGTGGTGGTGGTGGTGGT  
TTTGGTTCGATCCAGCGCTGGTGGCAGTCCGTCGGATCTGGGTCCCTCGATGGTTTAGCAGCTCCGATC  
GGTCAGCATCGCTGTCCCATTCTACACTGCCATCAAAATCAGAAAAGTGTCCCCAAGTTCGCTTGGGGG  
TTCCATTGGTCTTGGCGGCATCCAGATTTGCCTGCATTCTCACGCCGTCTGCTGCTCCTTCTTCTCTCTATT  
TGTCTCCGTGCTGTCCGCGAATGGGTACGTTTTTCAACGTTTTTGGCCTCTTGGCCATGACCCTCTTCGGTT  
TCTGGATCGAACTTTGTTCCGTTATTAAGTACCTAGGTACCTACGTCTATGACTCCATCGGCCTCTCTTTTC  
CTCCCTTCGGACTTTTGCATATCCACAATTGGCAACTCTCACCGATCTCCATCTCGTCAACCTCTCTCTCGT  
GCTTTGATAACGCTTATACTATCTTTCTCTTCTGTTAGCATTCAATTTGAAGACACTATCTTAATAAGCA  
AAAACCCTAAGACGCCATCGATCTGAACAATAAAAGTACCACGGAATTGTTACCAAAAGTGTGAAGCAT  
ATATGGCATCATCAGCCATTGAGAGACTACTATGTAATCAAGATCAAGACTCTTCTTCCATGACTTTTTGG  
TGCCATTGGTCTTGGGTTGGGGGTGTAATGGTCAAATAAACGGCAAGGGGGTGGTCAGCCCTGAGCGTCTGA  
TGAAGAGCGTGATGATAAAAACCTATACGGTGCAAGTTGTCGATAAAGACGGGGCACATGATGGGGATTCT  
TGGATGCCAGGGTCTTCCACCTAGTCCAGGGTGTCAAAGGAAATGCGGTCCCATTACTGGATCCATCCGAA  
CTGCTCCACACATCGCCACTCCCGTTGTGCTCTAGTTTTCCGATCTCAAGAGCTTCCCGATCGAGGT  
GTGATCACAGATCCTGGCCTCGGCGCTGAGACGGGATGATGGATACCGCTGTACACTAGATACGGGACAGC  
AGAGCAAGCGGCACCCGGACAATGGAACAGCAGCAAGCAGTCACTCTTCAACAAAAAATAAATAA  
TCGAAACGGCCATGTCGCCGGCATAACCACCCACAGCCTGGCTCCCGCGTTTTTGTCCATGGCTCACACAAAG  
ACCTCCCATCTCTTGTCCAGCCGTGGTCTCTTTGTGTACCCTCAGGCCACCCTTGCTACCTACGTACATG  
GAACGTGTAAGGGCGTGTGATCCGTTTCGATTGGATCGGCGTCTTGTCTCTGGCAACTGTCTCTTTTTTT  
TCTGTATGTCCCTGGCCCCCGTTGGCCTGCCCTGCCCTGGCTCTTGAGCTATGGTGTCTCTCCATACAGGA  
CCCTGGGCATCCCAAACACCCTGGCTCCCACTCAAATGGTGAGCAAGGGCGAGGAGCTGTTACCAGGGG  
TGGTGGCCATCCTGGTGCAGCTGGACGGCGACGTAACCGCCACAAGTTGAGCGTGTCCGGCGAGGGCGAG  
GGCGATGCCACCTACGGCAAGCTGACCCTGAAGTTCATCTGCACCACCGGCAAGCTGCCCGTGGCCTGGCC  
CACCTCGTGACCACCTTACCTACGGCGTGCAGTGTTCAGCCGCTACCCCGACCACATGAAGCAGCAGC  
ACTTCTTCAAGTCCGCCATGCCCGAAGGTACGTCCAGGAGCGCACCATCTTCTTCAAGGACGACGGCAAC  
TACAAGACCCGCGCGAGGTGAAGTTCGAGGGCGACACCTGGTGAACCGCATCGAGCTGAAGGGCATCGA  
CTTCAAGGAGGACGGCAACATCCTGGGGCACAAGCTGGAGTACAACACTACAACAGCCACAACGTCTATATCA  
TGGCCGACAAGCAGAAGAAGGCATCAAGGTGAACCTTCAAGATCCGCCACAACATCGAGGACGGCAGCGTG  
CAGCTCGCCGACCACTACCAGCAGAACACCCCATCGGCGACGGCCCCGTGCTGCTGCCCGACAACCACTA  
CCTGAGCACCCAGTCCGCCCCGAGCAAAGACCCCAACGAGAAGCGCGATCACATGGTCTGTGGAGTTCTG  
TGACCGCCGCGGGGATCACTCTCGGCATGGACGAGCTGTACAAGGGCGGGCGAGGGCGGGGAGGGCGGGCGG  
CCATTAATTAAGTAGAAGCGGCGAGTTAAGAATGGAGAGAGGAAAAGAAAAGGGGGGAGAGCGAAAGAGAA  
GTGGGACGAGAGGCAACAGTCACAGCACCTCCATGGCGCAATCACAACAACACTACAACCACAACAAGACAAC  
ATCAACATCAACATCGACAAACAAGGGGTGGGAATCAGACAACGATGTCTGTCATCGTGGCATAACGTCGGCGGCTT  
TGAGGGTTTTACTTTTTATGTTTTGTCTTCCGGGTTTTCTCATGTTTTGGTTAAGGGGATCACATCAACATCA  
TTGCGAAAGGGCTTTATTCTGCGATTGGGCATGGCGATGAGATTGGTCTTTAATTTTTTTATCCTCATATT  
CCCCATATATACACTACATCATTACAATCATGGGTTTTCTTCACTTCCGTCGTTCTTAAAAGACAAAGTGT  
TTGGTTTTTTTTATTTACCGCATCACCTACTCTTACATTATCATCTGTCAAGATGACAGAGCGGCATTCTGGC  
CCTCCTTTAGATCTTCATCTACAGGTTGCTTTGAATAAGGCAAATTCGAAGAGAATTGGATCTTTCGATGA

GGCGCTCTTCCATCGGCTTTTACGTTATGATGCGGGAAGCAAGCAGGCAGGCTTGTGGGTGGGAATGGAC  
TGGCAGAAGCGGTAGGAGAGAGTTATGAGTCTCGCAAATCAAGGAAGGGCCCGAGGATACAAGAGAGAGAA  
CGCGATGACTATTGTTGCTACCGCGAGGCCACAAGTTTTGGATTAGAACAGTTATTCGAGTGGGACACTG  
CAATGAATTAGGTCACATATCATTCTGCCAAATATGGAAACGGAATTCGCAAACACCGAAATATCAACAG  
AAGGAAATCCTATCTACTTCCATCAATGGACAAGCAGCGCTTAAACTATATCACTGTGCCATTGTACACG  
CAACAGAGAGCGTTCATCAAAGGGCTGATCAATGATTTAAAGACGCAAACCGTTTGACATTCAACTTTCT  
TGGACCGTCCATCATTCCGTCTAGTCCCTACTAGAGGATCCGACACTATAGAATACCTATTCTCGGTACTA  
TGCATTACATGTTAATTATTACATGCTTAAACGTAATCAACAGAAATTATATGATAATCATCGCAAGACCG  
GCAACAGGATTCAATCTTAAGAAACTTTATTGCCAAATGTTTGAACGATCTGCAGGTCGACGGATCAGATC  
TCGGTGACGGGCAGGACCGGACGGGGCGGTACCGGCAGGCTGAAGTCCAGCTGCCAGAAACCCACGTCATG  
CCAGTTCCTGCTTGAAGCCGGCCGCCGACGATGCCGCGGGGGGCATATCCGAGCGCCTCGTGCATGC  
GCACGCTCGGGTCTTGGGCAGCCCGATGACAGCGACCACGCTCTTGAAGCCCTGTGCCTCCAGGGACTTC  
AGCAGGTGGGTGTAGAGCGTGGAGCCCAGTCCCCTCGCTGGTGGCGGGGGGAGACGTACACGGTCGACTC  
GGCCGTCCAGTCGTAGGCGTTGCGTGCCTTCCAGGGGCCCGCTAGGCGATGCCGGCGACCTCGCCGTCCA  
CCTCGGCGACGAGCCAGGGATAGCGCTCCCGCAGACGGACGAGGTCGTCCGTCCACTCCTGCGGTTCTGTC  
GGCTCGGTACGGAAGTTGACCGTCTGTCTCGATGTAGTGGTTGACGATGGTGCAGACCGCCGGCATGTC  
CGCCTCGGTGGCACGGCGGATGTCCGGCCGGGCGTCTTCTGGGCTCATGGTTACTTCCCTAATCGAAGCTTT  
GCTTGGGTAGAATAGGTAAGTCAGATTGAATCTGAAATAAAGGGAGGAAGGGCGAACTTAAAGAAGGTATGA  
CCGGGTCTTCACTTACCTTGCTTGACAAACGCACCAAGTTATCGTGCACCAAGCAGCAGATGATAATAAT  
GTCTCCGTTTCTGTCTGCTAATAAGAGTCACACTTCCAGCGCCCGCTACTGCTACAAGTGGGGTGTATC  
TGACCAGTTGCTTAAATGAACCATCTTGTCAAACGACACAAATTTTGTGCTCACCGCCTGGACGACTAAAC  
CAAAATAGGCATTCATTGTTGACCTCCACTAGCTCCAGCCAAGCCAAAAAGTGCTCCTTCAATATCATCT  
TCTGTGAGTCTAGATGACTTGTTCCTGTACCTCGTCACCATCCAGCCACCGTCTGAAATAGACGCAGTTG  
CTGGGGCTGACAGGTCGCTTCCCTCGCACATATCATAGACAGGGCACCGCCACAAGGCGCCTCCATAAG  
GCCACTTGCCTCGGCTCAACTCCCATAAATGAGGTAACAATGCCTCCTTTGGTTGGATCATGGTCGAGGC  
GTCGTTGATTGCACGTCCTCGGATCCTGTTTGGGGATGCGCGTCACACGGTACCCCTTGCGCCATTGACC  
TTGACAGGCTCTACTAAGCCATCGTAGTATAGCACATCCACCAACTGCTGGATATCCGCCTCGCTCAACGT  
CGTATTATTTCGTGATGCCGGCGTGGTGGATGAACTTTGCAATGTCCGACACAGTCGGGTACGACTTGTAAAC  
CGGCCGGGAGAGGCAGCAATTGCGGCTTCCGGGGCCTGGTCTTCTTGGCCGGTGCCGGTGCCGCCGTGTCG  
TCGTTGGAAATCTCGCCCGCTGCGCTTTCGTCCTTGGAAATATCCTCCGAGTGGGGAATGGTCCCCTG  
AACCACGCCCTTCTTGGGATTCTTTTACGCTGTGTGCTCCTCCTCCTTGTGCTCCTACTCCTGGTACTC  
CAGCAGCCCGCGGTGGGAAGTATATGTCGATTTCTGCTTGATAAAGTCAAACACAATTTCTGTAGCTCG  
TTGATGAAGGCGTGTGAGCTCGCCCTCAGTAAACAGGGCCACCTGTGGCGCATCGGAGGACGCTAG  
GTTTCGCTTGTATCATCTTCTTGTGGGGTCTCGACGTTTCTCATGCTGGCGATGTAGCCCTTTTGT  
CGAGATACTTGATGCAATGCTTTCATAAGCGAGTCGGCCATGTTGAGCTTGTTCCTGATGGTCCGGTTCAG  
ATGCCGTGCGCCCCGGCTTTCGTCGACCATGGCGTATACCATCATTATTTTCGAGTGGGGAGGGAGGTGTA  
CCTTTTGGGAGGAAGGGGAGGTTAGTTGGTGTGCTCATTTAAATGCTGTTTCTGTGTGAAATTGTTATCC  
GCTCACAATTCACACAACATAGGAGCCGGAAGCATAAAGTGTAAAGCCTGGGGTGCCTAATGAGTGAGGT  
AACTCACATTAATTGCGTTGCGCTCACTGCCCGCTTTCAGTCGGGAAACCTGTGCTGCCAGCTGCATTAA  
TGAATCGGCCAACGCGCGGGGAGAGGCGGTTTTGCGTATTGGGCGCTTTCGCTTCCCTCGCTCACTGACTC  
GCTGCGCTCGGTGCTTCCGGCTGCGGCGAGCGGTATCAGCTCAAAAGGCGGTAATACGGTTATCCACAG  
AATCAGGGGATAACGCAGGAAAGAATGTGAGCAAAAGGCCAGCAAAAGGCCAGGAACCGTAAAAAGGCC  
GCGTTGCTGGCGTTTTTCCATAGGCTCCGCCCCCTGACGAGCATCACAAAAATCGACGCTCAAGTCAGAG  
GTGGCGAAACCCGACAGGACTATAAAGATACCAGGCGTTTTCCCCCTGGAAGCTCCCTCGTGCCTCTCCTG  
TTCCGACCCTGCGCTTACCGGATACCTGTCCGCTTCTCCTTCCGGAAGCGTGGCGCTTTCTCATAGC  
TCACGCTGTAGGTATCTCAGTTCGGTGTAGGTGCTTTCGCTCCAAGCTGGGCTGTGTGCAGCAACCCCGT  
TCAGCCCAGCCGCTGCGCCTTATCCGGTAACTATCGTCTTGAGTCCAACCCGGTAAGACACGACTTATCGC  
CACTGGCAGCAGCCACTGGTAAACAGGATTAGCAGAGCGAGGTATGTAGGCGGTGCTACAGAGTTCTTGAAG  
TGGTGGCCTAACTACGGCTACACTAGAAGGACAGTATTTGGTATCTGCGCTCTGCTGAAGCCAGTTACCTT  
CGGAAAAAGAGTTGGTAGCTCTTGATCCGGCAAACAAACCACCGCTGGTAGCGGTGGTTTTTTTTGTTTGA  
AGCAGCAGATTACGCGCAGAAAAAAGGATCTCAAGAAGATCCTTTGATCTTTTCTACGGGGTCTGACGCT  
CAGTGAACGAAAACCTCACGTTAAGGGATTTTTGGTCATGAGATTATCAAAAAGGATCTTCACCTAGATCCT  
TTTTAAATTAATAATGAAGTTTTAAATCAATCTAAAGTATATATGAGTAAACTTGGTCTGACAGTTACCAAT  
GCTTAATCAGTGAGGCACCTATCTCAGCGATCTGTCTATTTTCGTTTCATCCATAGTTGCCTGACTCCCCGTC  
GTGTAGATAACTACGATACGGGAGGGCTTACCATCTGGCCCCAGTGTGCAATGATACCGCGAGACCCACG  
CTCACC GGCTCCAGATTTATCAGCAATAAACCAGCCAGCCGGAAGGGCCGAGCGCAGAAGTGGTCTGCAA  
CTTTATCCGCTCCATCCAGTCTATTAATTGTTGCCGGGAAGCTAGAGTAAGTAGTTCGCCAGTTAATAGT  
TTGCGCAACGTTGTTGCCATTGCTACAGGCATCGTGGTGTACGCTCGTCTGTTGGTATGGCTTCATTACG

CTCCGGTTCCCAACGATCAAGGCGAGTTACATGATCCCCATGTTGTGCAAAAAAGCGGTTAGCTCCTTCG  
GTCCTCCGATCGTTGTCAGAAGTAAGTTGGCCGAGTGTATCACTCATGGTTATGGCAGCACTGCATAAT  
TCTCTTACTGTATGCCATCCGTAAGATGCTTTTCTGTGACTGGTGAAGTACTCAACCAAGTCATTCTGAGA  
ATAGTGTATGCGGCGACCGAGTTGCTCTTGGCCGGCGTCAATACGGGATAATACCGCGCCACATAGCAGAA  
CTTTAAAAGTGCTCATCATTGGAAAACGTTCTTTCGGGGCGAAAACCTCTCAAGGATCTTACCCTGTTGAGA  
TCCAGTTCGATGTAACCCACTCGTGCACCCAACTGATCTTCAGCATCTTTTACTTTTACCAGCGTTTCTGG  
GTGAGCAAAAACAGGAAGGCAAAATGCCGCAAAAAGGGAATAAGGGCGACACGGAAATGTTGAATACTCA  
TACTCTTCTTTTTCAATATTATTGAAGCATTTATCAGGGTTATTGTCTCATGAGCGGATACATATTTGAA  
TGTATTTAGAAAAATAAACAAATAGGGGTTCCGCGCACATTTCCCGAAAAGTGCCACCTGAACGAAGCAT  
CTGTGCTTCATTTTGTAGAACAAAATGCAACGCGAGAGCGCTAATTTTTCAAACAAAGAATCTGAGCTGC  
ATTTTTACAGAACAGAAATGCAACGCGAAAAGCGCTATTTTTACCAACGAAGAATCTGTGCTTCATTTTTGTA  
AAACAAAATGCAACGCGAGAGCGCTAATTTTTCAAACAAAGAATCTGAGCTGCATTTTTACAGAACAGAA  
ATGCAACGCGAGAGCGCTATTTTTACCAACAAAGAATCTATACTTCTTTTTTGTCTACAAAAATGCATCCC  
GAGAGCGCTATTTTTCTAACAAAGCATCTTAGATTACTTTTTTCTCCTTTGTGCGCTCTATAATGCAGTC  
TCTTGATAACTTTTTGCACTGTAGGTCCGTTAAGGTTAGAAGAAGGCTACTTTGGTGTCTATTTTTCTCTTC  
CATAAAAAAAGCCTGACTCCACTTCCCGGTTTTACTGATTACTAGCGAAGCTGCGGGTGCATTTTTTCAAG  
ATAAAGGCATCCCCGATTATATTCTATAACCGATGTGGATTGCGCATACTTTGTGAACAGAAAAGTGATAGCG  
TTGATGATTCTTCATTGGTCAGAAAATTATGAACGGTTTTCTTCTATTTTTGTCTCTATATACTACGTATAGG  
AAATGTTTACATTTTTCGTATTGTTTTCGATTCACTCTATGAATAGTTCTTACTACAATTTTTTGTCTAAA  
GAGTAATACTAGAGATAAAACATAAAAAATGTAGAGGTCGAGTTTAGATGCAAGTTC AAGGAGCGAAAGGTG  
GATGGGTAGGTTATATAGGATATAGCACAGAGATATATAGCAAAGAGATACTTTTGGCAATGTTTTGTGG  
AAGCGGTATTCGCAATATTTTAGTAGCTCGTTACAGTCCGGTGCCTTTTTGGTTTTTGAAGTGCCTCTT  
CAGAGCGCTTTTTGGTTTTCAAAGCGCTCTGAAGTTCCTATACTTTCTAGAGAATAGGAACCTCGGAATAG  
GAACCTCAAAGCGTTTTCCGAAAACGAGCGCTTCCGAAAATGCAACGCGAGCTGCGCACATACAGCTCACTG  
TTCACGTGCGACCTATATCTGCGTGTGCTGTATATATATATACATGAGAAGAACGGCATAAGTGCCTGTT  
TATGCTTAAATGCGTACTTATATGCGTCTATTTATGTAGGATGAAAGGTAGTCTAGTACCTCCTGTGATAT  
TATCCCATTCATGCGGGGTATCGTATGCTTCTTCCAGCACTACCCTTTAGCTGTTCTATATGCTGCCACT  
CCTCAATTGGATTAGTCTCATCTTCAATGCTATATTTCTTTGATATTGGATCATACTAAGAAACCATT  
ATTATCATGACATTAACCTATAAAAATAGGCGTATCACGAGGCCCTTTTCGTC

PRIMERS :

WC-1 FORWARD

GAAGCGGAATGGAGATGAC

WC-1 REVERSE

ATTCTTAACTCGCCGCTTCT

GFP FORWARD

TGACCCTGAAGTTCATCTGC

GFP REVERSE

GAAGTCGTGCTGCTTCATGT

ACTIN FORWARD

TCCATCATGAAGTGCGATGT

ACTIN REVERSE

CCTTCATGGAAGAAGGAGCA
