# Supplementary material for: Light-Inducible System for Tunable Protein Expression inNeurospora crassa
Source: Oxford University Press journal article supplement (doi:10.1534/g3.112.003939), 2012-10-01
Supplement: 1207_figures1.pdf [file 1207_figures1.pdf]

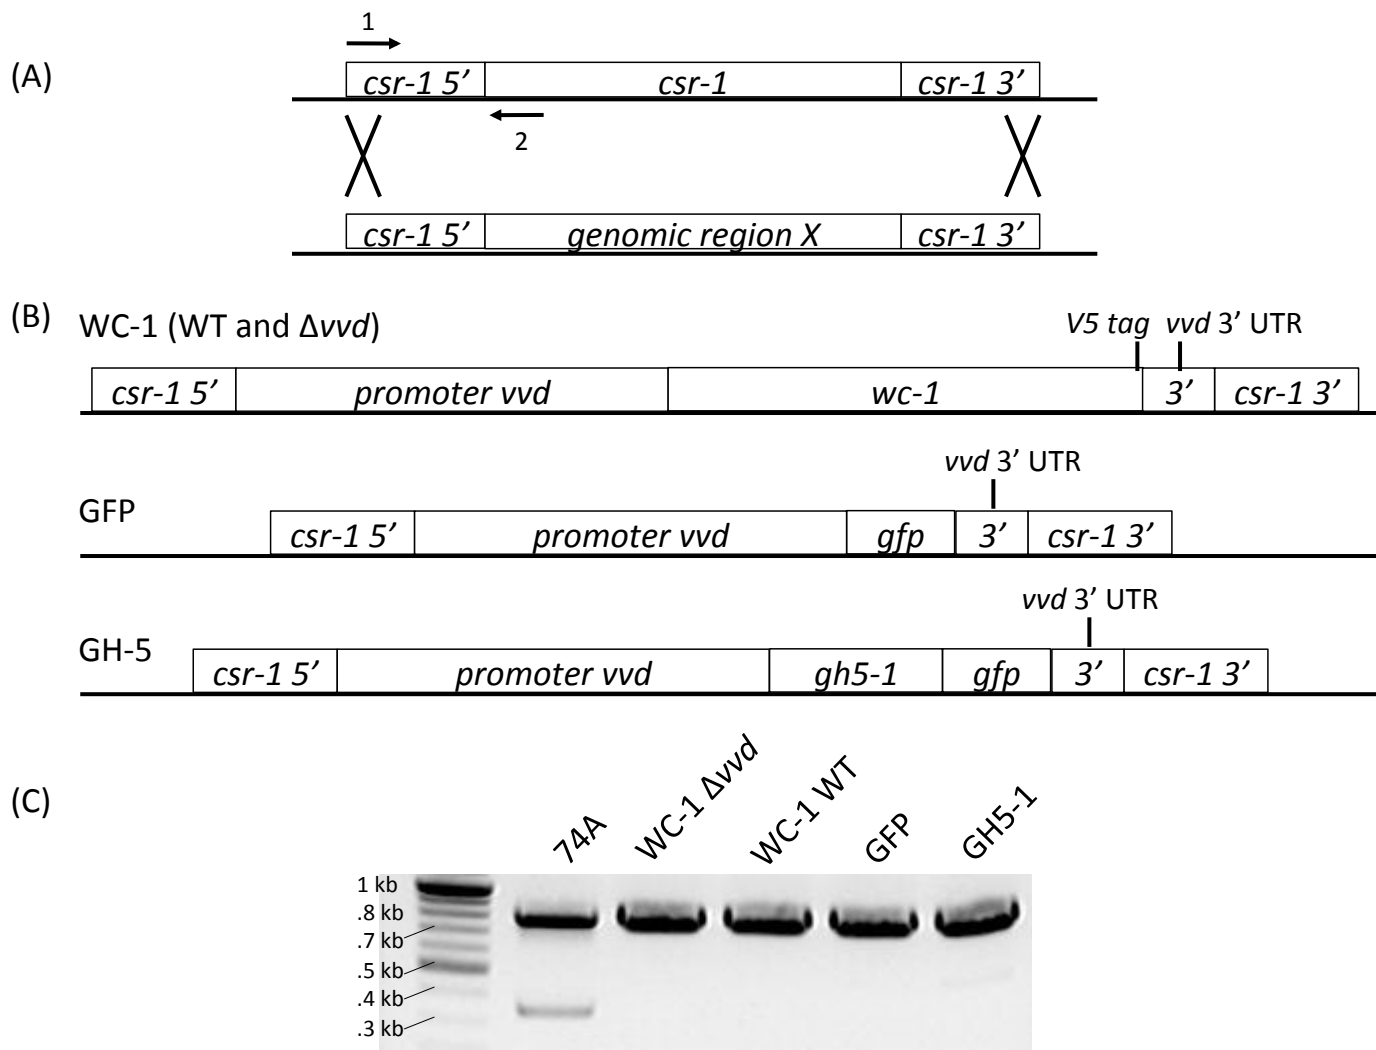

**Figure S1** Constructs used to examine *vvd* promoter-driven gene expression. **(A)** Constructs bearing either *wc-1*, *gfp* or *gh5-1* were transformed into a WT or  $\Delta vvd$  strain at the *csr-1* locus (BARDIYA and SHIU 2007). The arrows represent primers used in the PCR genotyping analysis in **(B)**. Representation of constructs designed to test expression from the *vvd* promoter. Cassette containing *gh5-1* is based off of the design from Sun et. al. using the *vvd* promoter in place of the *ccg-1* promoter (SUN et al. 2011). **(C)** Genomic DNA samples from *wt*,  $\Delta vvd$  *wc-1<sup>v5</sup>*, *wt wc-1<sup>v5</sup>*, *gfp* and *gh5-1* strains were subjected to PCR analysis to examine the *csr-1* locus. Bands at 350 bp represent the presence of the *csr-1* locus while bands at 750 bp represent the presence of the *actin* locus (+ control).

BARDIYA, N., and P. K. SHIU, 2007 Cyclosporin A-resistance based gene placement system for *Neurospora crassa*. *Fungal Genet Biol* **44**: 307-314.

SUN, J., C. M. PHILLIPS, C. T. ANDERSON, W. T. BEESON, M. A. MARLETTA et al., 2011 Expression and characterization of the *Neurospora crassa* endoglucanase GH5-1. *Protein Expr Purif* **75**: 147-154.
