# Supplementary material for: Light-Inducible System for Tunable Protein Expression inNeurospora crassa
Source: Oxford University Press journal article supplement (doi:10.1534/g3.112.003939), 2012-10-01
Supplement: 1207_tables1.pdf [file 1207_tables1.pdf]

GATTACCTCCAACGCCTAGATGAAACCAAATTACCCTTGCCCTTCTTTTTTTTTTACGCCGTTAATGCAGTTG  
TGATAGAGACCATGCAACGTCTTCTAAACGGAGACACAAACACATTTCGAGTCGATCAGATCGAAATGACTT  
GTTCTGTACCTCGTCACCATCCAGCCACCGTCTGAAATAGACGCAGTTGCTGGGGCTGACAGGTCCGCCT  
TCCTCGCACATATCATAGACAGGGCACC GCCACAAGGCGCCTCCATAAGGCCACTTGCCTCGGGCTCAAC  
TCCCATAAATGAGGTAACAATGCCTCCTTTGGTTGGATCATGGTCGAGGCGTCTGTTGATTGCACGTCTCG  
GATCCTGTTTGGGGATGCGCGTCACACGGTACCCCTTGCGCCCATTTGACCTTGACAGGCTCTACTAAGCCA  
TCGTAGTATAGCACATCCACCAACTGCTGGATATCCGCCTCGCTCAACGTCGTATTATTTCGTGATGCCGGC  
GTGGTGGATGAACTTTGCAATGTCCGACACAGTCGGGTACGACTTGTAAACGGCCGGGAGAGGCAGCAATT  
GCGGCTTGCCGGCCCTGGTCTTCTTGCCGGTGCCGGTGCCGCCGTGTCTGCTGTTGGAAATCTCGCCCGC  
CTGCGCTTCGTCCCTTGGAATATCCTCCGAGTGGGGAATGGTCCCCTGAACCACGCCCTTCTTGGGATT  
CTTTTACGCTGCTGTGCTCCTCCTCCTTGTGCTCCTACTCCTGGTACTCCAGCACCGCCGCCGTGGGAAG  
TATATGTCGATTTCTGCTTGATAAAGTCAAACACAATTTCTGTAGCTCGTTGATGAAGGCCGTTGTAAAA  
CGACGGCCAGTGAGCGCGCGTAATACGACTCACTATAGGGCGAATTGGGTACCGGGCCCCCCTCGAGGTC  
GACGGTATCGATAAGCTTGATATCGAATTCCTGCAGCCCGGGGATCCACTAGTTCTAGAGCGGCCGCCAC  
CGCGGTGGAGCTCCAGCTTTTGTCCCTTTAGTGAGGGTTAATTGCGCGCTTGGCGTAATCATGGTCATAG  
CTGTTTCTGTGTGAAATTGTTATCCGCTCACAATTCACACAACATAGGAGCCGGAAGCATAAAGTGTA  
AGCCTGGGGTGCCTAATGAGTGAGGTAACACATTAATTGCGTTGCGCTCACTGCCCGCTTTCCAGTCGG  
GAAACCTGTCTGTCAGCTGCATTAATGAATCGGCCAACGCGCGGGGAGAGGCGGTTTGGCTATTGGGCGC  
TCTTCCGCTTCCCTCGCTCACTGACTCGCTGCGCTCGGTCTGTTCCGGCTGCGGCGAGCGGTATCAGCTCACTC  
AAAGCGGTAATAACGGTTATCCACAGAATCAGGGGATAACGAGGAAAGAATGTGAGCAAAAAGCCAGC  
AAAAGGCCAGAAACCGTAAAAAGGCCGCTTGTGCTGGCTTTTTTCCATAGGCTCCGCCCTTCCAGGAGCAT  
CACAAAAATCGACGCTCAAGTCAGAGGTGGCGAAACCCGACAGGACTATAAAGATAACAGGCGTTTTCCCC  
TGGAAGCTCCCTCGTGCCTCTCCTGTTCCGACCCTGCCGCTTACCGGATACCTGTCCGCTTTTCTCCCTT  
CGGGAAGCGTGGCGCTTTTCTCATAGCTCACGCTGTAGGTATCTCAGTTCCGGTGTAGGTGCTTCCGCTCCAAG  
CTGGGCTGTGTGCACGAACCCCGTTCAGCCCGACCGCTGCGCCTTATCCGGTAACTATCGTCTTGAGTC  
CAACCCGGTAAGACACGACTTATCGCCACTGGCAGCAGCCACTGGTAACAGGATTAGCAGAGCGAGGTATG  
TAGGCGGTGCTACAGAGTTCTTGAAGTGGTGGCCTAACTACGGCTACACTAGAAGGACAGTATTTGGTATC  
TGCGCTCTGCTGAAGCCAGTTACCTTCGGA AAAAGAGTTGGTAGCTCTTGATCCGGCAAACAAACCACCGC  
TGGTAGCGGTGGTTTTTTTTGTTTGCAAGCAGCAGATTACGCGCAGAAAAAAGGATCTCAAGAAGATCCTT  
TGATCTTTTCTACGGGGTCTGACGCTCAGTGGAAACGAAAACACGTTAAGGGATTTTGGTCATGAGATTA  
TCAAAAAGGATCTTACCTAGATCCTTTTAAATTA AAAATGAAGTTTTAAATCAATCTAAAGTATATATGA  
GTAAACTTGGTCTGACAGTTACCAATGCTTAATCAGTGAGGCACCTATCTCAGCGATCTGTCTATTTCTGTT  
CATCCATAGTTGCCTGACTCCCCGTCGTGTAGATAACTACGATACGGGAGGGCTTACCATCTGGCCCCAGT  
GCTGCAATGATACCCGAGACCCACGCTCACGGCTCCAGTTTATCAGCAATAAACCAGCCAGCCGGAAG  
GGCCGAGCGCAGAAGTGGTCTGCAACTTTATCCGCTCCATCCAGTCTATTAATTGTTGCCGGGAAGCTA  
GAGTAAGTAGTTCCGCGATTAAAGTTTGGCGAACGTTGTTGCCATTGCTACAGGCATCGTGGTGTACGCG  
TCGTCGTTTTGGTATGGCTTCATTCAGCTCCGGTTCCCAACGATCAAGGCGAGTTACATGATCCCCATGTT  
GTGCAAAAAGCGGTTAGCTCCTTCCGCTCCTCCGATCGTTGTGAGAAGTAAGTTGGCCGCGAGTGTATCAC  
TCATGGTTATGGCAGCACTGCATAATTCTCTTACTGTCTATGCCATCCGTAAGATGCTTTTCTGTGACTGGT  
GAGTACTCAACCAAGTCATTCTGAGAATAGTGTATGCGGCGACCGAGTTGCTCTTGGCCGGCGTCAATACG  
GGATAATACCGCGCCACATAGCAGAACTTTAAAAGTGCTCATCATTGGAAAACGTTCTTCCGGGGCGAAAAC  
TCTCAAGGATCTTACCGCTGTTGAGATCCAGTTCGATGTAACCCACTCGTGCACCCAACTGATCTTCAGCA  
TCTTTTACTTTTACCAGCGTTTTCTGGGTGAGCAAAAACAGGAAGGCAAAATGCCGCAAAAAGGGAATAAG  
GGCGACACGGAAATGTTGAATACTCATACTCTTCTTTTTTCAATATTATTGAAGCATTATCAGGGTTATT  
GTCTCATGAGCGGATACATATTTGAATGTATTTAGAAAAATAAACAATAGGGGTTCCGCGCACATTTCCC  
CGAAAAGTGCCACCTGAACGAAGCATCTGTGCTTCATTTTGTAGAACA AAAATGCAACGCGAGAGCGCTAA  
TTTTTCAAACAAGAATCTGAGCTGCATTTTTTACAGAACAGAAATGCAACGCGAAAAGCGCTATTTTTACCAA  
CGAAGAATCTGTGCTTCATTTTTTGTAAAACA AAAATGCAACGCGAGAGCGCTAATTTTTTCAAACAAGAAT  
CTGAGCTGCATTTTTTACAGAACAGAAATGCAACGCGAGAGCGCTATTTTTACCAACAAGAATCTATACTTC  
TTTTTTGTTCTACAAAATGCATCCCGAGAGCGCTATTTTTTCTAACAAAGCATCTTAGATTACTTTTTTTC  
TCCTTTGTGCGCTCTATAATGCAGTCTCTTGATAACTTTTTGCACTGTAGGTCCGTTAAGGTTAGAAGAAG  
GCTACTTTGGTGTCTATTTTTCTTCCATAAAAAAGCCTGACTCCACTTCCCGGTTTTACTGATTACTAG  
CGAAGCTGCGGGTGCATTTTTTCAAGATAAAGGCATCCCGATTATATTCTATAACCGATGTGGATTGCGCA  
TACTTTGTGAACAGAAAGTGATAGCGTTGATGATTCTTCATTGGTCAGAAAATTATGAACGGTTTTCTTCTA  
TTTTGTCTCTATATACTACGTATAGGAAATGTTTACATTTTTCTGATTGTTTTTTCGATTCACTCTATGAATAG  
TTCTTACTACAATTTTTTTGTCTAAAGAGTAATACTAGAGATAAACAATAAAAAATGTAGAGGTCGAGTTTA  
GATGCAAGTTCAAGGAGCGAAAAGGTGGATGGGTAGGTTATATAGGGATATAGCACAGAGATATATAGCAAA  
GAGATACTTTTGGCAATGTTTGTGGAAGCGGATTTCCGAATATTTTAGTAGCTCGTTACAGTCCGGTGCC

TTTTTGGTTTTTTTGAAGTGCCTCTTCAGAGCGCTTTTGGTTTTTCAAAGCGCTCTGAAGTTCCTATACTT  
TCTAGAGAATAGGAACTTCGGAATAGGAACTTCAAAGCGTTTCCGAAAACGAGCGCTTCCGAAAATGCAAC  
GCGAGCTGCGCACATACAGCTCACTGTTACGTCGCACCTATATCTGCGTGTTCCTGTATATATATATAC  
ATGAGAAGAACGGCATAGTGCCTGTTTATGCTTAAATGCGTACTTATATGCGTCTATTTATGTAGGATGAA  
AGGTAGTCTAGTACCTCCTGTGATATTATCCCATTCATGCGGGGTATCGTATGCTTCCTTCAGCACTACC  
CTTTAGCTGTTCTATATGCTGCCACTCCTCAATTGGATTAGTCTCATCCTTCAATGCTATCATTTCCTTTG  
ATATTGGATCATACTAAGAAACCATTATTATCATGACATTAACCTATAAAAAATAGGCGTATCACGAGGCC  
TTTCGTC

PVVD-WC-1 :

TCGCGCTTTTCGGTGATGACGGTGAAAACCTCTGACACATGCAGCTCCCGGAGACGGTCACAGCTTGTCTG  
TAAGCGGATGCCGGGAGCAGACAAGCCCGTCAGGGCGCTCAGCGGGTGTGGCGGGTGTGGGGCTGGCT  
TAACTATGCGGCATCAGAGCAGATTGTACTGAGAGTGCACCATAACCACAGCTTTTCAATTCAATTCATCAT  
TTTTTTTTTATTCTTTTTTTTTGATTTTCGGTTTCTTTGAAATTTTTTTGATTTCGGTAATCTCCGAACAGAAG  
GAAGAACGAAGGAAGGAGCACAGACTTAGATTGGTATATATACGCATATGTAGTGTGAAGAAACATGAAA  
TTGCCAGTATTCTTAACCCAACCTGCACAGAACAAAAACCTGCAGGAAACGAAGATAAAATCATGTCGAAAAG  
CTACATATAAGGAACGTGCTGCTACTCATCTAGTCTGTTGCTGCCAAGCTATTTAATATCATGCACGAA  
AAGCAAACAACTTGTGTGCTTCATTGGATGTTTCGTACCACCAAGGAATTACTGGAGTTAGTTGAAGCATT  
AGGTCCCAAAATTTGTTTACTAAAAACACATGTGGATATCTTGACTGATTTTTCCATGGAGGGCACAGTTA  
AGCCGCTAAAGGTCATTATCCGCAAGTACAATTTTTTACTCTTTCGAAGACAGAAAATTTGCTGACATTGGT  
AATACAGTCAAATTCAGTACTCTGCGGGTGTATACAGAATAGCAGAATGGGCAGACATTACGAATGCACA  
CGGTGTGGTGGGCCAGGTATTGTTAGCGGTTTGAAGCAGGCGGCAGAAGAAGTAACAAAGGAACCTAGAG  
GCCTTTTGATGTTAGCAGAATTGTCATGCAAGGGCTCCCTATCTACTGGAGAATATACTAAGGGTACTGTT  
GACATTGCGAAGAGCGCAAAAGATTTTTGTTATCGGCTTTATTGCTCAAAGAGACATGGGTGGAAGAGATGA  
AGGTTACGATTGGTTGATTATGACACCCGGTGTGGGTTTAGATGACAAGGAGACGCATTGGGTCAACAGT  
ATAGAACCGTGGATGATGTGGTCTCTACAGGATCTGACATTATTATTGTTGGAAGAGGACTATTTGCAAAG  
GGAAGGGATGCTAAGGTAGAGGGTGAACGTTACAGAAAAGCAGGCTGGGAAGCATATTTGAGAAGATGCGG  
CCAGCAAAACTAAAAACTGTATTATAAGTAAATGCATGTATACTAAACTCACAAATTAGAGCTTCAATTT  
AATTATATCAGTTATTACCCTATGCGGTGTGAAATACCGCACAGATGCGTAAGGAGAAAATACCGCATCAG  
GAAATTGTAAACGTTAATATTTTTGTTAAAATTCGCGTTAAATTTTTGTTAAATCAGCTCATTTTTTTAACCA  
ATAGGCCGAAATCGGCAAAATCCCTTATAAATCAAAGAATAGACCGAGATAGGGTTGAGTGTGTTCCAG  
TTTGGAACAAGAGTCCACTATTAAGAACGTGGACTCCAACGTCAAAGGGCGAAAAACCGTCTATCAGGGC  
GATGCCCTACTACGTGAACCATCACCTAATCAAGTTTTTTGGGGTTCGAGGTGCCGTAAGCACTAAATCG  
GAACCCCAAAGGGCCCCCGATTTAGAGCTTACGCGGGTAAAGCCGGCGAACGTTGGCAGAAAGGAAGGGA  
AGAAAGCGAAAGGAGCGGGCGCTAGGGCGCTGGCAAGTGTAGCGGTCACGCTGCGCGTAACCACCACACC  
GCCGCGCTTAATGCGCCGCTACAGGGCGCGTTCGCGCCATTCCGCATTTCAGGCTGCGCAACTGTTGGGAAGG  
GCGATCGGTGCGGGCCTCTTCGCTATTACGCCAGCTGGCGAAAGGGGGATGTGCTGCAAGGCGATTAAGTT  
GGGTAACGCCAGGGTTTTCCAGTCACGACGATTTAAATTAGATCCAATCTGAGCCTCGCGGTGATGATTG  
CCAGACGGGCGGGATGCTGTGGCGACTTGGTGGTTTTTTGTTCCGGCTGATCGCTTTCAGGGCGACGTTTCA  
CGGTCTTGTGCGGATCAGATGGACATTGAGGTGGCCTAGCGTCAGGGTGCCTGAGCGCTGACCTCAACT  
GACGCCGTTCAAGGCCGACCCTGCGCTTGACCCAACACCCTGACACCAAGAAGCCAGTGGAAACCAGGAG  
GTCTGCCAAGACTTTGAAAGCTTGGCACGAGCGTCTCAGCTCTTTGAAGCCTGAGTTTTTCAGGCAAGAATT  
CTGCTTGTAAATGCGGGGCCGGCCGACAACGCGGGGCGGGAGGGGACGCTCGGCCGCGGAGCTCGCT  
TCCATGCATTTTGGATGGAGTAAAAATTTGTTAAACACCCGACCCGACTCCGTTCTCCCTCTCGTCTCAGGT  
CTTTGTTGTGCATCCATCGCCGTGTAGCAGATTTCCATCGTTTCGTTTGTTCGGACTTTACCTTGTACTTTT  
AGCTTCATTATCATCCTACAATCATCCAGGATTTTCATCTTCCACAACCGGTACGTTATCATTTTTTACTTTTT  
GTTGCCATGTTCTTCTTGAGCCTTTTTCTGTCTAGAGGAGCTCTCCCTGCGCGCTGGGAGCTTGCCCAAAGC  
TCCAAGCTCTATCTGTGGCAGAGCTCTGAGAGCTTCCATTCCCGGGATTTCTTGGCATCAGATTCAATTCG  
AATGTCCTTTTTTCCATCCACGCTCGAGATGAGGGGTGAGGTTTGTAGTTTGACAATACCACCACCGCCT  
TTTTGGTCCCTACCCAGACATGGCCATCAAGGTCGTTAATGCCGTCATCCCTCTTGTTCGGCTTGGGGTA  
TCGTCCATGGCTCCGCAATGTCGTCAATGGCTGCATTGACAGAGGGGGACTCCAAATGAAAGAGGCAATCG  
CAACGCTATGAAGACCAACAAGCCATATGATGGAGCCATGGGTCTACGGTCTTTGGCCCCGATGTCTTT  
GGATAGCTCTTGCAGCGCTTTAGCTGCCAACTATACACACACCGGAATTATACGATTTAGGTGACTGCAG  
GATTAACCCTCACTAAAGGGACAGTGGCATCAAACACAAGCCAGTGGCATCAAACACAAGCCGCTTTAAC  
ATCGGAGTATACTACACACACACGCACTCTCAGCAGTGTGTTTTTGGAAAGATCGAATGCTGACTTAAACA  
GGCAACCTCTTACGAAGACCCGGCTTGGCGTTTATTATTCCGGTGTAAACCAAGCGCTGGGACTGTGCACCG  
TGTCACATCGAGATTTCAAACCTGCTCTGCGGTGCTGCAGTACCAGGTTATCATGGAACATAATTGGAAACCA  
AGCGGCAGGTTGAGCAAAGTCTTGCCCTGAAAGTTGGCACATTAGAGCCATCCCGTTTTCGGTTGCAGATG

GATGAAAAACGAGCGGAATACACGGGAACAGGGCAAGGTGACCATGACATGGGCGAAAGGTAAGTAGCCGG  
GGACAGACGCAACCCGCGCACATCCCGAAAGGGGAAGTTGCGATAATCCCGTGTTGTGACTTCTCCCTCTT  
CCCTCGATGATGTGCCGACGCCAACGCCATCACTTATTACGCCAGCACTGTGATTGAGCTTGCCTGCTT  
CCTGGCGTCTATGGCCTCCCGTATCCTGCTGGTGATCATCCCAATCTGTCAAGTCTCATTTCCCTCATT  
CCCATCACGATGAGGAGCCTGAGACTTTTTCGGGAAAAGAGGGGGCGTTCGATAGTTTGGTCCGTTTTGTGCA  
CGGTATTCATGTGATGTCCCTACAGTTGCATGAGACCAGGCCGCCCTGTTGTTGTTTCATGGTTCTCTCCCA  
GTCCCAAGGGAGCCAGGCTGGGGCGCCCCCTCCCCCTCCTTCTTTTGTCTTCCACAACCTTCATGACC  
CCCCATGCGCCTCTGCCTAAAGGTCTACCACCTACCGGACCTCTGCTCATCAAGACCCCCAAGATGCC  
CGCCCGCTTTATCGCCATACAGTAAATTGACTGTACATATACCCGACGATAACCTGGTTGCTGTTGGATCC  
AAACTCGGGCTGTGAGCATAACAAGCGAGAAGCGTGGGTACCTCACGGCTGGTTCGGCGCAAAGGGACGAG  
GTAGGTTTTGTAGTGTAGCAAGGGGTTTCGGCCTTGACGCCTACAAGGGAGCAGATGGAATGGGAACACCAT  
AACACCAGGCCAGAACCAAGGCATCACACATGTCTTTAGCGCAACGATATCAGCAAGCTCTCCGAACA  
CATATGAAGATGGGTTCCGCTATTATGGTCTGGCGGTGTTGAGTACTTGAGGTACATATCTACCTACCTA  
CCTACCTACCTACCTACCTACCTACCTACCTACCTACCTACCAACCAACCAACCTCCCCACCAACCTCTCG  
GGTTCGGGCAGATTAACGTTGGTGGTTAAGGTGTCAAGTGTGATGTCCGGTGGTGGTGGTGGTGGTGGTGGT  
GTGCGCGGTGCGCATTGACAGCCGGTGCAGGACAACCTGAAAGGAACCGAAACCGAAGAGACAACCTTGA  
CAGATGGAAGTGACTAAGTAACTCCCTAGAGCACTAGGGTTGACGTTGCAGTAAAAACGTGCCCGTTTTCT  
TTCCCTATCTGCACTGTCCGCTGGCTGGTTGGTGCCTTTCAATTGTTTCGTGCTGGCGCGTGGGTCCCGTT  
CTTGGTTCGATCCACGGCGCTGGTGCATCGCTGCGGATCTGGGTCCCTCGATGGTTTAGCAGCTGCGATC  
GGTCAGCATCGTCTCCCATCTACACTGCCATCAAAAACAGAAAGTGTCCCAAGTGTCCGTTGGGGG  
TTCCATTGGTCTTGGCGGCATCCAGATTTGCCTGCATTCTCACGCCGTCTGCTGCTCCTTCTCTCTCTATT  
TGTCTCCGTGCTGTCCGCAATGGGTACGTTTTTCAACGTTTTTGGCCTCTTGGCCATGACCCTCTTCGGTT  
TCTGGATCGAACTTTGTTCCGTTATTAAGTACCTAGGTACCTACGTCTATGACTCCATCGGCCTCTCTTTC  
CTCCCTTCGGACTTTTGCATATCCACAATTGGCAACTCTCACCGATCTCCATCTCGTCAACCTCCTCTCGT  
GCTTTGATAACGCTTATACTATCTTTCTCTTCTGTTAGCATTCAATTTGAAGACACTATCTTAATAAGCA  
AAAACCTAAGACGCCATCGATCTGAACAATAAAAGTACCACGGAATTGTTACCAAAAAGTGTGAAGCAT  
ATATGGCATCATCAGCCATTGAGAGACTACTATGTAATCAAGATCAAGACTCTTCTTCCATGACTTTTTGG  
TGCCATTGGTCTTGGGTTGGGGGTGTAATGGTCAAATAAACGGCAAGGGGGTGGTTCAGCCCTGAGCGTCA  
TGAAGAGCGTGATGATAAAAACCTATACGGTGCAAGTTGTGATAAAGACGGGGCACATGATGGGGATTCT  
TGGATGCCAGGGTCTTCCACCTAGTCCAGGGTGTCAAAGGAAATGCGGTCCCATTAAGTGGATCCATCCGAA  
CTGCTCGAACATCGGGCCACTCCCGTTGTGTCTCTGAGTTTCCCGATCTCAAGAGCTTCCCGATGCAGGC  
TGTGATCACAGATCTGGCCTCGGCGCTGAGACGGGATGATGGATAACCGCTGTACACTAGATAACGGACAG  
CAGAGCAAGCGGCACCCGGACAATGGAACAGCAGCAAGCAGTCACTCTTCAACAAAAAAAATAACAAAA  
ATCGAAACGGCCATCTCGCCGGCATAACCACCCAGCAGCCTGGCTCCCGCGTTTTTGTCCATGGCTCACAAAA  
GACCTCCCATCTCTTGTCCAGCCGTGGTCTCTTTGTGTACCCTCAGGCCACCCTTGCTACCTACGTACAT  
GGAACGTGTAAGGCGTGTGTACCCTGATTGGATCGGCGTCTTGTCTCTGGCAACTGTCTCTCTTTTTT  
TTCTGTATGTCCCTGGCCCCCGTTGGCCTGCCCTGCCTGGCTCTTGAGCTATGGTGTCTCTCCATACAGG  
ACCCTGGGCATCCCAAACACCCCTGGCTCCCACTTCAAAAATGAACAACAACACTACTACGGTTCCCGCTGTC  
TCCTGAGGAGCTTACGATCAAATGCACCAGCACCAGCAGCAGCAGCAACAACAACAACAACAACAGC  
AGCAGCAGCAGCAGCAACAACAACAACAGCAACAACAGCAACAACAGCATCAGCATCAGCAGCAACAACAAA  
ACCAATCAGCATCGCAATGCCGGCATGATGAATACGCCTCAACTACAAATCAAGGAAACAGCAGATTCA  
CGCTTCAGATGTAACCATGTGAGGAGGAAGCGACTCTCTTGATGAAATCATCCAGCAGAACCTCGACGAAA  
TGCATCGAAGGCGGAGTGTCCCCAGCCCTATGGGGGCCAGACTAGGAGGTTGTCCATGTTTGGATTACGCG  
AACCCCAACGATGGTTTTCTCGGACTATCAACTCGATAATATGTGAGGAAATTACGGGGACATGACTGGCGG  
CATGGGCATGTGAGGCACCTCGAGCCCGTATGCAGGGCAGAAACATCATGGCCATGTGCGACCACAGCGGTG  
GATACTCGCACATGTGCCCCAATGTTATGGGCAACATGATGACTTACCCCAACCTCAACATGTACCCTCT  
CCCCGATCGAGAACCCTATTCTTTCGGCCGGACTCGACACTATTTCGCACCGATTTTTTCCATGGACATGAA  
CATGGATAGTGGCTCCGTGAGCGCAGCCAGCGTACATCCACCCCTGGGCTTAATAAGCAGGACGACGAGA  
TGATGACCATGGAGCAGGGCTTTGGTGGAGGTGACGATGCCAACGCCTCTCACCAGGCCCAACAAAACATG  
GGCGGTTTTGACTCCGGCCATGACTCCGGCCATGACCCCTGCAATGACCCCGGGTGTGAGCAACTTTGCACA  
AGGCATGGCTACACAGTCTCACAGGATGCGGCAAGCACACCCGCGACAACCTTCCAGTCTCCGTCTTAT  
CCGCAACAACACAGACAATACGAATTGGGCCGCCGCCACCAGCGAGCGTCACCAATGCCCCACCCAGCG  
CCATTTACCTCGACGCCGTGAGTGGAGGAGCGTCCAGACAAAGAGCATTTACTCCAAAAGCGGTTTTGCA  
CATGCTGAGGGCGTTGTGGTATGTGGCATCGAGGAAGGACCCAAAGCTTAAGCTCGGTGCCGTGGACATGT  
CTTGTGCATTTGTGCTGTGATGTAACACTCAACGATTGCCCATCATTTATGTGTCCGATAACTTCCAA  
AACCTCACGGGCTATAGTCGCCACGAGATTGTGCGGGCGGAACTGCCGCTTCTTGCAGGCCCCCGACGGTAA  
TGTGGAGGCTGGCACCAAGCGCAATTTGTGAAAAACAACGCCGTATATACGCTCAAGAAGACCATCGCGG  
AGGGCCAGGAGATTACGACAGATCTGATCAATTATCGGAAGGGCGCAAGCCTTCTGAAATTTGTTGACC

ATGATTCCCATTCCCTGGGATACCGAAGAAATCCGTTATTTTCATTGGATTTTCAGATCGATCTCGTGGAAATG  
CCCTGATGCCATAATCGGCCAGGAAGGAAATGGGCCCATGCAGGTCAACTATACCCACAGCGATATCGGGC  
AGTACATCTGGACGCCACCTACCCAGAAGCAACTGGAGCCTGCCGACGGCCAGACTTTGGGCGTTGATGAT  
GTTTCGACACTTTTTCAGCAATGTAATTCGAAGGGTGTTCATCCGACTGGCACAACAATCCTGGGATAA  
GATGCTTTTGGAGAACGCAGACGATGTTGTCCATGTGTTGTGCTCAAGGGTCTCTTCTTATACCTATCTC  
CGGCCTGTAAGAAAGTGTGGAGTACGATGCCAGCGACCTCGTTGGGACCTCGCTGTCTCGATTTGCCAC  
CCGTCCGACATCGTGCCGGTGACGAGGGAGTTGAAAGAGGCCAGCAACACACTCCAGTCAATATAGTCTT  
CAGAATTCGGAGAAAAGAACAGTGGTTATACCTGGTTTGAAGCCACGGAACATTGTTCAACGAACAGGGTA  
AGGGTCGCAAGTGTATCATTCTTGTGGGGAGAAAACGCCCGTTTTTGTCTACACAGAAAAGGACCTCGAA  
CTCAACGGCGGTATTGGTGACAGCGAAATTTGGACCAAGGTCTCGACATCAGGCATGTTCTTGTTCGTTTC  
GTCGAATGTCCGGTGCCTCCTGGATTTGTCCCGGAGAACCTCCAAGGTACCAGCATGCAAGATCTCATGC  
GCAAGGAATCCAGAGCCGAGTTTGGGAGGACGATAGAGAAAAGCTAGAAAAGGGCAAGATCGCGAGCTGCAAG  
CATGAGGTGCAAAAACAAGCGTGGCCAGGTGCTCCAGGCCTATACAACATTCTACCCCGGAGATGGTGGTGA  
GGGTCAAAGGCCAACGTTTTTGTGGCGCAAAACAAAGCTGTTGAAGGCGTCATCAAGGACACTAGCTCCCG  
CGACCGTAACGGTCAAGAATATGTCTCCGGGCGGTGTTCTTTGTGCGCAATGAAAGGGATCCAGACCGAC  
AGTGATAGCAACACTCTCATGGGCGGGATGTCGAAGTCGGGAAGCAGCGATAGTACGGGGGCCATGGTCTC  
AGCTCGTAGCAGTGCAGGACCCGGCCAGGATGCGGGCTTTGGACGCCGATAACATATTTGACGAACTCAAGA  
CAACGCGTTGCACCAGCTGGCAGTACGAGCTGAGGCAAAATGGAGAAGGTGAATCGCATGTTGGCCGAAGAG  
CTGGCGCAGCTTTTGTCTAACAAGAAAAACGGAAACGAAGAAAGGGAGGAGGTAACATGGTGAGGGATTG  
TGCAAATTTGCCATACGAGGAACACGCCGAATGGCGCGTGGCCAAAGCGGGAATCGAGATCTATGCAACA  
GTTTGAGGTTGAGATGGGCAAGCAGACTGGGCGGTATCGCCGCGCACCTCATCCGAGGTGGGAATGGT  
GATTCGATGAGCAAGAAGAGCAATTCACCTAGTCACTCGTCGCCCTTCATCGAGAAGTCGGCAACGATTC  
ACCGTCTACTACCACCGCTACCAAGAACTCACCTCTCTTTCGAGGAAGTAGCACCCTGCACCCGGTACGA  
TCACAACGGACAGCGGACCAGCAGTGCATCGAGCGCTAGTGAACCGGTAGTACGACTATAGCTACTTCA  
GCCAATTCTGCTGCATCAACCGTCAACGCCCTGGGCCCTCCTGCGACAGGTCCCAGTGGCGGCTCACCGGC  
TCAACATCTTCCGCTCATCTCCAGGGAACACACCTTAACGCCCAGGCCATGCAGCGTGTACACCAGCATA  
AGCAGCATCAGCAGCATCAACAGCAGCATCAACAGCAGCATCAACAGCAGCATCAACAGCAGCACC AACAG  
CTTCAGCAGCATCAGTTCAACCTCCACAAAGCCAGCCACTCCTGGAAGGCGGAAGCGGTTTTCCGTGGAAG  
CGGAATGGAGATGACCTCAATTAGGGAAGAGATGGGCGAACATCAACAGGGCTTAAGTGTAGGTAAGCCTA  
TCCCTAACCTCTCCTCGGTCTCGATTCTACGTA AAAAGCGGCGAGTTAAGAATGGAGAGAGGAAAAAGAAA  
GGGGGAGAGCGAAAGAGAAGTGGGACGAGAGGCAACAGTCAACAGCACCTCCATGGCGCAATCACAACAAC  
TACAACCACAACAAGATCAACATCAACATCAACATCGACAACAAGGGGTGGGAATCAGACAACGATGTCA  
TCTGGCATACTCGCGGCTTTGAGGGTTTTACTTTTTATGTTTTGTCTATTCCGGGGTTTTCTCATGTTTGT  
AAGGGATCAGATCAACATCATTGCGAAAGGCGCTTTATTCTGCGATTGGGCATGGCGATGAGATGGTCT  
TTAATTTTTTATCCTCATATTCCCCATATATACACTACATCATTACAATCATGGGTTTTCTTCACTTCCGT  
CGTTCTTAAAAGACAAAGTGTGGTTTTTTATTTACCGCATCACCTACTCTTACATTATCATCTGTCAAG  
ATGACAGAGCGGCATTCTGGCCCTCCTTTAGATCTTCATCTACAGGTTGCTTTGAATAAGGCAAAATTGCAA  
GAGAATTGGATCTTTTCGATGAGGCGCTCTTCCATCGGCTTTTACGTTATGATGCGGGAAGCAAGCAGGCAG  
GCTTGTGGGTGGGAATGGACTGGCAGAAGCGGTAGGAGAGAGTTATGAGTCTCGCAAATCAAGGAAGGGC  
CCGAGGATACAAGAGAGAGAACCGGATGACTATTGTTGCTACCGCGAGGCCACAAGGTTTTGGATTAGAAC  
AGTTATTCGAGTGGGACACTGCAATGAATTAGGTACATATCATTCTGCCAAATATGAAACCGGAATTCTG  
CAAACACCGAAATATCAACAGAAGGAAATCCTATCTACTTCCATCAATGGACAAGCAGCGCTTAAACTATA  
TCACTGTGCCATTGTACACGCAACAGAGAGCGTTCATCAAAGGGCTGATCAATGATTTAAAGACGCAAAAC  
CGTTTTGACATTCAACTTTTCTTGGACCGTCCATCATTCCGTCTAGTCTCCTACTAGAGGATCCGACACTATA  
GAATACCTATTCTCGTACTATGCATTACATGTTAATTATTACATGCTTAACGTAATTCAACAGAAATTAT  
ATGATAATCATCGCAAGACCGGCAACAGGATTC AATCTTAAGAAACTTTATTGCCAAATGTTTGAACGATC  
TGCAGGTCGACGGATCAGATCTCGGTGACGGGCAGGACCGGACGGGGCGGTACCGGCAGGCTGAAGTCCAG  
CTGCCAGAAACCCACGTATGCCAGTTCCTGCTTGAAGCCGGCCGCCGCGCAGCATGCCGCGGGGGGCAT  
ATCCGAGCGCCTCGTGCATGCGCACGCTCGGGTCTGTTGGGCAGCCCGATGACAGCGACCACGCTCTTGAAG  
CCCTGTGCCTCCAGGGACTTCAGCAGGTGGGTGTAGAGCGTGGAGCCAGTCCCGTCCGCTGGTGGCGGGG  
GGAGACGTACACGGTCTGACTCGGCCGTCCAGTCTGAGGCGTTGCGTGCCTTCCAGGGGCCGCGTAGGCGA  
TGCCGGCGACCTCGCCGTCCACCTCGGCGACGAGCCAGGGATAGCGCTCCCGCAGACGGACGAGGTCTGTC  
GTCCACTCCTGCGGTTCTGCGGCTCGGTACGGAAGTTGACCGTGCTTGTCTCGATGTAGTGGTTGACGAT  
GGTGCAGACCCGGCATGTCCGCTCGGTGGCACGGCGGATGTCCGGCCGGGCGTCTGTTCTGGGCTCATGG  
TTACTTCTTAATCGAAGCTTTGCTTGGGTAGAATAGGTAAGTCAGATTGAATCTGAAATAAAGGGAGGAAG  
GGGCAACTTAAGAAGGTATGACCGGGTCTTCACTTACCTTGTGTTGACAAAACGCACCAAGTTATCGTGCAC  
CAAGCAGCAGATGATAATAATGTCTCCTGCTGCTGCTAATAAGAGTCACACTTCGAGCGCCGCGCTA  
CTGCTACAAGTGGGGCTGATCTGACCAGTTGCCTAAATGAACCATCTTGTCAAACGACACAAATTTGTGC

TCACCGCCTGGACGACTAAACCAAAATAGGCATTTCATTGTTGACCTCCACTAGCTCCAGCCAAGCCCCAAA  
AGTGCTCCTTCAATATCATCTTCTGTGAGTCTAGATGACTTGTTCCTGTACCTCGTCACCATCCAGCCAC  
CGTCTGAAATAGACGCAGTTGCTGGGGCTGACAGGTCCGCTTCTCGCACATATCATAGACAGGGCACCG  
CCCACAAGGCGCCTCCATAAGGCCACTTGCCTCGGCTCAACTCCCATAAATGAGGTAACAATGCCTCCTT  
TGGTTGGATCATGGTTCGAGGCGTCTGTTGATTGCACGTCTCGGATCCTGTTTGGGGATGCGCGTCACACGG  
TACCCCTTGGCGCCATTGACCTTGCAGGCTCTACTAAGCCATCGTAGTATAGCACATCCACCAACTGCTG  
GATATCCGCCTCGCTCAACGTCTGATTATTTCGTGATGCCGGCGTGGTGGATGAACTTTGCAATGTCCGACA  
CAGTCGGGTACGACTTGTAAACCGCCGGGAGAGGCAGCAATTGCGGCTTGCCTGGGCTTGGCTTCTTGGCC  
GGTGCCGGTGCCTGCTCGTCTGTTGAAATCTCGCCCGCTGCGCTTCTGCTCCCTTGGAAATATCCTC  
CGAGTGGGGAATGGTCCCCTGAACCACGCCCTTCTTGGGATTCTTTTACGCTGCTGTGCTCCTCCTCCTT  
GTGCTCCTACTCCTGGTACTCCAGCACCGCCGCGTGGGAAGTATATGTCGATTTCTGCTTGATAAAGTCA  
AACACAATTTCTGTAGCTCGTTGATGAAGGCCGTGTGAGCTCGCCCTCAGTAAACCAGGGGCCACCTGT  
GGCGCGATCGGAGGGACGTAGGTTTCGCTTGTATGTACATCTTCTTGTGGGGTGTGCGACTTCTTCATGC  
TGGCGATGTAGCCCTTTTGTGCTGAGATACTTGTATGCAATGCTTCATAAGCGAGTCGGCCATGTTGAGCTTG  
TTCTTGTATGGTCCGGTTCAGATGCCGTCCGCCCCGGCTTCTGTCGACCATGGCGTATACCATCATTATTTT  
GGAGTTGGGGAGGGAGGTGTACCTTTTGGGAGGAAGGGGAGGTTAGTTGGTGTGCTCATTTAAATGCTGTT  
TCCTGTGTGAAATTGTTATCCGCTCACAATTTCCACACAACATAGGAGCCGGAAGCATAAAGTGTAAAGCCT  
GGGGTGCCTAATGAGTGAGGTAACCTCACATTAATTGCGTTGCGCTCACTGCCCGCTTTCCAGTCGGGAAAC  
CTGTGCTGCCAGCTGCATTAATGAATCGGCCAACGCGCGGGGAGAGGCGGTTTGCATTTGGGCGCTCTTC  
CGCTTAATCTCGCTCACTGACTCGCTGCGCTCGCTCGCTTGGCTGCGGCGAGCGGTATCAGCTCACTCAAAG  
CGGTAACACGGTTATCCACAGAATCAGGGGATAACGCAAGAAAGAATGTGAGCAAAAAGGCCAGCAAAAG  
GCCAGGAACCGTAAAAAGGCCGCTTGTGGCGTTTTTTCATAGGCTCCGCCCCCTGACGAGCATCACAA  
AAATCGACGCTCAAGTCAGAGGTGGCGAAACCCGACAGGACTATAAAGATACCAGGCGTTTTCCCCCTGGAA  
GCTCCCTCGTGCCTCTCCTGTTCCGACCCTGCCGCTTACCGGATACCTGTCCGCCTTTCTCCCTTCGGGA  
AGCGTGGCGCTTTCTCATAGCTCACGCTGTAGGTATCTCAGTTCGGTGTAGGTGCTTCCGCTCCAAGCTGGG  
CTGTGTGCACGAACCCCCGTTTCCAGCCGACCGCTGCGCTTATCCGGTAACTATCGTCTTGTAGTCCAACC  
CGGTAAGACACGACTTATCGCCACTGGCAGCAGCCACTGGTAACAGGATTAGCAGAGCGAGGTATGTAGGC  
GGTGTACAGAGTTCTTGAAGTGGTGGCCTAACTACGGCTACACTAGAAGGACAGTATTTGGTATCTGCGC  
TCTGCTGAAGCCAGTTACCTTCCGAAAAAGAGTTGGTAGCTCTTGTATCCGGCAAACAAACCACCGCTGGTA  
GCGGTGGTTTTTTTTGTTTGAAGCAGCAGATTACGCGCAGAAAAAAGGATCTCAAGAAGATCCTTTGATC  
TTTTCTACGGGGTCTGACGCTCAGTGGAACGAAAACCTCACGTTAAGGGATTTTGGTTCATGAGATTATCAA  
AAGGATCTTACCTAGATCCTTTTAAATTAATAATGAAGTTTTAAATCAATCTAAAGTATATATGAGTAAA  
CTTGGTCTGACAGTTACCAATGCTTAATCAGTGAGGACCTATCTCAGCGATCTGTCTATTTCTGTTTCTC  
ATAGTTGCTGACTCCCCGTCGTGTAGATAACTCAGTACCGGGAGGGCTTACCATCTGCCCCCAGTGTGC  
AATGATACCGCGAGACCCACGCTCACCGGCTCCAGATTTATCAGCAATAAACCAGCCAGCCGGAAGGGCCG  
AGCGCAGAAGTGGTCTGCAACTTTATCCGCCTCCATCCAGTCTATTAATTGTTGCCGGGAAGCTAGAGTA  
AGTAGTTCGCCAGTTAATAGTTTGGCGAACGTTGTTGCCATTGCTACAGGCATCGTGGTGTACGCTCGTC  
GTTTGGTATGGCTTCATTACGCTCCGGTTCACCAACGATCAAGGCGAGTTACATGATCCCCCATGTTGTGCA  
AAAAAGCGGTTAGCTCCTTCCGCTCCTCCGATCGTTGTGCAAGTAAGTTGGCCGCGAGTGTATCACTCATG  
GTTATGGCAGCACTGCATAATTCTTACTGTATGCCATCCGTAAGATGCTTTTTCTGTGACTGGTGAGTA  
CTCAACCAAGTCATTCTGAGAATAGTGTATGCGGCGACCGAGTTGCTCTTGGCCGGCGTCAATACGGGATA  
ATACCGCGCCACATAGCAGAACTTTAAAGTGTCTCATCTTGGAAAACGTTCTTCCGGGGCGAAAACCTCTCA  
AGGATCTTACCGCTGTTGAGATCCAGTTCGATGTAACCCACTCGTGCACCCAACTGATCTTCAGCATCTTT  
TACTTTACCCAGCGTTTCTGGGTGAGCAAAAACAGGAAGGCAAAATGCCGCAAAAAGGGGAATAAGGGCGA  
CACGGAATGTTGAATACTCATACTCTTCTTTTTCAATATTATTGAAGCATTATCAGGGTTATTGTCTC  
ATGAGCGGATACATATTTGAATGTATTTAGAAAAATAAACAATAGGGGTTCCGCGCACATTTCCCCGAAA  
AGTGCCACCTGAACGAAGCATCTGTGCTTCATTTTGTAGAACAATAAATGCAACGCGAGAGCGCTAATTTTT  
CAAACAAGAATCTGAGCTGCATTTTTACAGAACAGAAATGCAACGCGAAAGCGCTATTTTTACCAACGAAG  
AATCTGTGCTTCATTTTTGTAAAACAAAATGCAACGCGAGAGCGCTAATTTTTCAAACAAGAATCTGAG  
CTGCATTTTTACAGAACAGAAATGCAACGCGAGAGCGCTATTTTTACCAACAAGAATCTATACTTCTTTTT  
TGTTCTACAAAATGCATCCCAGAGCGCTATTTTTCTAACAAAGCATCTTAGATTACTTTTTTCTCCTT  
TGTGCGCTCTATAATGCAGTCTCTTGATAACTTTTTGCACTGTAGGTCCGTTAAGGTTAGAAGAAGGCTAC  
TTTGGTGTCTATTTTTCTTCCATAAAAAAGCCTGACTCCACTTCCCGGTTTTACTGATTACTAGCGAAG  
CTGCGGGTGCATTTTTTCAAGATAAAGGCATCCCCGATTATATTCTATACCGATGTGGATTGCGCATACTT  
TGTGAACAGAAAGTGATAGCGTTGATGATTCTTCATTGGTTCAGAAAATTATGAACGGTTTTCTTCTATTTT  
TCTCTATATACTACGTATAGGAAATGTTTACATTTTCGTATTGTTTTCGATTCACTCTATGAATAGTTCTT  
ACTACAATTTTTTGTCTAAAGAGTAATACTAGAGATAAACATAAAAAATGTAGAGGTGAGTTTAGATGC  
AAGTTCAAGGAGCGAAAGGTGGATGGTAGGTTATATAGGGATATAGCACAGAGATATATAGCAAAGAGAT

ACTTTTGAGCAATGTTTGTGGAAGCGGTATTCGCAATATTTTAGTAGCTCGTTACAGTCCGGTGCCTTTTT  
GGTTTTTTGAAAGTGCCTTTTCAGAGCGCTTTTGGTTTTTCAAAGCGCTCTGAAGTTCCTATACTTTCTAG  
AGAATAGGAAC TTCGGAATAGGAAC TTCAAAGCGTTTTCCGAAAACGAGCGCTTCCGAAAATGCAACGCGAG  
CTGCGCACATACAGCTCACTGTTTCACGTGCGACCTATATCTGCGTGTTCCTGTATATATATATACATGAG  
AAGAACGGCATAGTGCCTGTTTATGCTTAAATGCGTACTTATATGCGTCTATTTATGTAGGATGAAAGGTA  
GTCTAGTACCTCCTGTGATATTATCCCATTCCATGCGGGGTATCGTATGCTTCCTTCAGCACTACCCTTTA  
GCTGTTCTATATGCTGCCACTCCTCAATTGGATTAGTCTCATCCTTCAATGCTATCATTTTCTTTGATATT  
GGATCATACTAAGAAACCATTATTATCATGACATTAACCTATAAAAATAGGCGTATCACGAGGCCCTTTTCG  
TC

PVVD-GFP :

TCGCGCGTTTTCCGGTGATGACGGTGAAAACCTCTGACACATGCAGCTCCCGGAGACGGTCACAGCTTGTCTG  
TAAGCGGATGCCGGGAGCAGACAAGCCCGTCAGGGCGCGTCAGCGGGTGTGGCGGGTGTGGGGCTGGCT  
TAACTATGCGGCATCAGAGCAGATTGTACTGAGAGTGCACCATAACCACAGCTTTTTCAATTCATTCATCAT  
TTTTTTTTTATTCTTTTTTTTTGATTTTCGGTTTTCTTTGAAATTTTTTTGATTTCGGTAATCTCCGAACAGAAG  
GAAGAACGAAGGAAGGAGCACAGACTTAGATTGGTATATATACGCATATGTAGTGTGAAGAAACATGAAA  
TTGCCCAGTATTCTTAACCCAACCTGCACAGAACAAAACCTGCAGGAAACGAAGATAAATCATGTCGAAAAG  
CTACATATAAGGAACGTGCTGCTACTCATCCTAGTCTGTGCTGCCAAGCTATTTAATATCATGCACGAA  
AAGCAAACAAACTTGTGTGCTTCATTGGATGTTTCGTACCACCAAGGAATTACTGGAGTTAGTTGAAGCATT  
AGGTCCTAAAATTTGTTTACTAAAAACACATGTGGATATCTTGACTGATTTTTTCCATGGAGGGCACAGTTA  
AGCCGCTAAAGGCATTATCCGCCAAGTACAATTTTTTACTCTTCAAGACAGAAAATTTGCTGACATTGGT  
AATACAGTCAAATTCAGTACTCTGCGGGTGTATACAGAATAGCAGAATGGGCAGACATTACGAATGCACA  
CGGTGTGGTGGGCCAGGTATTGTTAGCGGTTTTGAAGCAGGCGGCAGAAGAAGTAACAAAGGAACCTAGAG  
GCCTTTTTGATGTTAGCAGAATTGTCATGCAAGGGCTCCCTATCTACTGGAGAATATACTAAGGGTACTGTT  
GACATTGCGAAGAGCGACAAAGATTTTTGTTATCGGCTTTATTGCTCAAAGAGACATGGGTGGAAGAGATGA  
AGGTTACGATTGGTTGATTATGACACCCGGTGTGGGTTTTAGATGACAAGGGAGACGCATTGGGTCAACAGT  
ATAGAACCGTGGATGATGTGGTCTCTACAGGATCTGACATTATTATTGTTGGAAGAGGACTATTTGCAAAG  
GGAAGGGATGCTAAGGTAGAGGGTGAACGTTACAGAAAAGCAGGCTGGGAAGCATATTTGAGAAGATGCGG  
CCAGCAAAACTAAAAACTGTATTATAAGTAAATGCATGTATACTAAACTCACAAATTAGAGCTTCAATTT  
AATTATATCAGTTATTACCCTATGCGGTGTGAAATACCGCACAGATGCGTAAGGAGAAAATACCGCATCAG  
GAAATTTGTAACGTTAATATTTTTGTTAAAAATTCGCGTTAAATTTTTGTTAAATCAGTCATTTTTTAACCA  
ATAGGCCGAAATCGGCAAAATCCCTTATAAATCAAAGAATAGACCGAGATAGGGTTGAGTTGTTCCAG  
TTTGAAGCAAGAGTCCACTATTAAGAACGTGGACTCCAACGTCAAAGGGCGAAAACCGTCTATCGGGC  
GATGGCCACTACGTGAACCATCACCTAATCAAGTTTTTTGGGGTCGAGGTGCCGTAAAGCACTAAATCG  
GAACCCTAAAGGGAGCCCCGATTTAGAGCTTGACGGGAAAGCCGGCGAACGTGGCGAGAAAGGAAGGGA  
AGAAAGCGAAAGGAGCGGGCGCTAGGGCGCTGGCAAGTGTAGCGGTACAGCTGCGCGTAACCACCACACC  
GCCGCGCTTAATGCGCCGCTACAGGGCGCGTCGCGCCATTCCGCATTCCAGGCTGCGCAACTGTTGGGAAGG  
GCGATCGGTGCGGGCCTCTTCGCTATTACGCCAGCTGGCGAAAGGGGGATGTGCTGCAAGGCGATTAAGTT  
GGGTAACGCCAGGGTTTTCCAGTCACGACGATTTAAATTAGATCCAATCTGAGCCTCGCGGTGATGATTG  
CCAGACGGGCGGGATGCTGTGGCGACTTGGTGGTTTTTTGTTTCGGGCTGATCGCTTTTCAGGGCGACGTTTCA  
CGGTCTTGTGCGGGATCAGATGGACATTGAGGTGGCCTAGCGTCAGGGTGCCTGAGCGCTGACCTCAACT  
GACGCCGTCCAAGGCCGACCCCTGCGCTTGACCCAACACCCTGACACCAAGAAGCCAGTGAACCCAGGAG  
GTCTGCCAAGACTTTGAAAGCTTGGCACGAGCGTCTCAGTCTTTGAAAGCCTGAGTTTTTCAGGCAAGAATT  
CTGCTTGTAAATGCGGGCCGGCCGACAACCGGGGCGGGGAGGGGACGCTCGGCCGCGGAGCTCGCT  
TCCATGCAATTTGGATGGAGTAAAAATTTGTTAAACACCCGACCCGACTCCGTTCTCCCTCTCGTCTCAGGT  
CTTTGTTGTGCATCCATCGCCGTGTAGCAGATTTCCATCGTTTCGTTTGTTCGGACTTTACCTTGTACTTTT  
AGCTTCATTATCATCCTACAATCATCCAGGATTTTCATCTTCCACAACCGGTACGTTATCATTTTTTACTTTT  
GTTGCCATGTTCTTCTTGAGCCTTTTTCTGTCTAGAGGAGCTCTCCCTGCCGGCTGGGAGCTTGCCCAAAGC  
TCCAAGCTCTATCTGTGGCAGAGCTCTGAGAGCTTCCATTCCCGGGATTTCTTGGCATCAGATTCAATTCG  
AATGTCCTTTTTTCCATCCACGCTCGAGATGAGGGGTGAGGTTTTGTTAGTTTGACAATACCACCACCGCCT  
TTTGGTCCCTACCCAGACATGGCCATCAAGGTCGTTAATGCCGTCCATCCCTCTTGTTCGGCTTGGGGTA  
TCGTCCATGGCTCCGCAATGTCGTCAATGGCTGCATTGACAGAGGGGGACTCAAATGAAAGAGGCAATCG  
CAACGCTATGAAGACCAACAAGCCATATGATGGAGCCATGGGTCTACGGTCTTTGGCCCCGGATGTCTTT  
GGATAGCTCTTGCCAGCGCTTTAGCTGCCAACTATACACACACCCGGAATTATACGATTTAGGTGACTGCAG  
GATTAACCCTCACTAAAGGGACAGTGGCATCAAACACAAGCCAGTGGCATCAAACACAAGCCGTCTTTAAC  
ATCGGAGTATACTACACACACACGCACTCTCAGCAGTGTGTTTTTGGAAAGATCGAATGCTGACTTAACACA  
GGCAACCTCTTACGAAGACCCGGCTTGCCGTTTTATTATTCGGTGTAAACCAAGCGCTGGGACTGTGCACC





GGCGCTCTTCCATCGGCTTTTACGTTATGATGCGGGAAGCAAGCAGGCAGGCTTGTGGGTGGGAATGGAC  
TGGCAGAAGCGGTAGGAGAGAGTTATGAGTCTCGCAAATCAAGGAAGGGCCCGAGGATACAAGAGAGAGAA  
CGCGATGACTATTGTTGCTACCGCGAGGCCACAAGTTTTGGATTAGAACAGTTATTCGAGTGGGACACTG  
CAATGAATTAGGTCACATATCATTCTGCCAAATATGGAAACGGAATTCGCAAACACCGAAATATCAACAG  
AAGGAAATCCTATCTACTTCCATCAATGGACAAGCAGCGCTTAAACTATATCACTGTGCCATTGTACACG  
CAACAGAGAGCGTTCATCAAAGGGCTGATCAATGATTTAAAGACGCAAACCGTTTGACATTCAACTTTCT  
TGGACCGTCCATCATTCCGTCTAGTCCCTACTAGAGGATCCGACACTATAGAATACCTATTCTCGGTACTA  
TGCATTACATGTTAATTATTACATGCTTAAACGTAATTAACAGAAATTATATGATAATCATCGCAAGACCG  
GCAACAGGATTCAATCTTAAGAAACTTTATTGCCAAATGTTTGAACGATCTGCAGGTCGACGGATCAGATC  
TCGGTGACGGGCAGGACCGGACGGGGCGGTACCGGCAGGCTGAAGTCCAGCTGCCAGAAACCCACGTCATG  
CCAGTTCCCGTGCTTGAAGCCGGCCGCCCGCAGCATGCCGCGGGGGGCATATCCGAGCGCCTCGTGCATGC  
GCACGCTCGGGTCTTGGGCAGCCCGATGACAGCGACCACGCTCTTGAAGCCCTGTGCCTCCAGGGACTTC  
AGCAGGTGGGTGTAGAGCGTGGAGCCCAGTCCCGTCCGCTGGTGGCGGGGGGAGACGTACACGGTCGACTC  
GGCCGTCCAGTCGTAGGCGTTGCGTGCCTTCCAGGGGCCCGCTAGGCGATGCCGGCGACCTCGCCGTCCA  
CCTCGGCGACGAGCCAGGGATAGCGCTCCCGCAGACGGACGAGGTCGTCCGTCCACTCCTGCGGTTCTGTC  
GGCTCGGTACGGAAGTTGACCGTGTCTCGATGATGAGTGGTTGACGATGGTGCAGACCGCCGGCATGTC  
CGCCTCGGTGGCACGGCGGATGTCCGGCCGGGCGTCTTCTGGGCTCATGGTTACTTCCCTAATCGAAGCTTT  
GCTTGGGTAGAATAGGTAAGTCAGATTGAATCTGAAATAAAGGGAGGAAGGGCGAACTTAAAGAAGGTATGA  
CCGGGTCTTCACTTACCTTGCTTGACAAACGCACCAAGTTATCGTGCACCAAGCAGCAGATGATAATAAT  
GTCTCCGTTCCCTGTCTGTCTAATAAGAGTCACACTCTCGAGCGCCCGCTACTGCTACAAGTGGGGCTGATC  
TGACCAGTTGCTTAAATGAACCATCTTGTCAAACGACACAAATTTTGTGCTCACCGCCTGGACGACTAAAC  
CAAAATAGGCATTCAATTGTTGACCTCCACTAGCTCCAGCCAAGCCAAAAAGTGCTCCTTCAATATCATCT  
TCTGTGAGTCTAGATGACTTGTTCCTGTACCTCGTCACCATCCAGCCACCGTCTGAAATAGACGCAGTTG  
CTGGGGCTGACAGGTCCGCCTTCCCTCGCACATATCATAGACAGGGCACCGCCACAAGGCGCCTCCATAAG  
GCCACTTGCCTCGGCTCAACTCCCATAAATGAGGTAACAATGCCTCCTTTGGTTGGATCATGGTCGAGGC  
GTCGTTGATTGCACGTCCTCGGATCCTGTTTGGGGATGCGCGTCACACGGTACCCCTTGCGCCATTGACC  
TTGACAGGCTCTACTAAGCCATCGTAGTATAGCACATCCACCAACTGCTGGATATCCGCCTCGCTCAACGT  
CGTATTATTTCGTGATGCCGGCGTGGTGGATGAACTTTGCAATGTCCGACACAGTCGGGTACGACTTGTAAAC  
CGGCCGGGAGAGGCAGCAATTGCGGCTTCCGGGGCCTGGTCTTCTTGGCCGGTGCCGGTGCCGCCGTGTCG  
TCGTTGGAAATCTCGCCCGCGCTGCGCTTTCGTCCCCTTGGAAATATCCTCCGAGTGGGGAATGGTCCCCTG  
AACCACGCCCTTCTTGGGATTCTTTTACGCTGTGTGCTCCTCCTCCTTGTGCTCCTACTCCTGGTACTC  
CAGCACCGCCCGGTGGGAAGTATATGTCGATTTCTGCTTGATAAAGTCAAACACAATTTCTGTAGCTCG  
TTGATGAAGGCGTGTGAGCTCGCCCTCAGTAAACAGGGCCACCTGTGGCGCATCGGAGGGACGTAG  
GTTTCGCTTGTATGATCATCTTCTTGTGGGGTGTGACGTTCTTCATGCTGGCGATGTAGCCCTTTTGT  
CGAGATACTTGATGCAATGCTTTCATAAGCGAGTCGGCCATGTTGAGCTTGTTCCTGATGGTCCGGTCCAG  
ATGCCGTGCGCCCCGGCTTTCGTGACCATGGCGTATACCATCATTATTTTCGGAGTTGGGGAGGGAGGTGTA  
CCTTTTGGGAGGAAGGGGAGGTTAGTTGGTGTGCTCATTTAAATGCTGTTTCTGTGTGAAATTGTTATCC  
GCTCACAATTCACACAACATAGGAGCCGGAAGCATAAAGTGTAAAGCCTGGGGTGCCTAATGAGTGAGGT  
AACTCACATTAATTGCGTTGCGCTCACTGCCCGCTTTCAGTCGGGAAACCTGTGTCGTCAGCTGCATTAA  
TGAATCGGCCAACGCGCGGGGAGAGGCGGTTTTGCGTATTGGGCGCTCTTCCGCTTCTCGCTCACTGACTC  
GCTGCGCTCGGTGCTTCCGGCTGCGGCGAGCGGTATCAGCTCAAAAGGCGGTAATACGGTTATCCACAG  
AATCAGGGGATAACGCAGGAAAGAATGTGAGCAAAAGGCCAGCAAAAGGCCAGGAACCGTAAAAAGGCC  
GCGTTGCTGGCGTTTTTCCATAGGCTCCGCCCCCTGACGAGCATCACAAAAATCGACGCTCAAGTCAGAG  
GTGGCGAAACCCGACAGGACTATAAAGATACCAGGCGTTTTCCCCCTGGAAGCTCCCTCGTGCCTCTCCTG  
TTCCGACCCTGCCGCTTACCGGATACCTGTCCGCTTCTCCTTCCGGAAGCGTGGCGCTTTCTCATAGC  
TCACGCTGTAGGTATCTCAGTTCCGTTGAGTGTGTTGCTCGTCCAAGCTGGGCTGTGTGCAGCAACCCCGT  
TCAGCCCAGCCGCTGCGCCTTATCCGGTAACTATCGTCTTGAGTCCAACCCGGTAAGACACGACTTATCGC  
CACTGGCAGCAGCCACTGGTAAACAGGATTAGCAGAGCGAGGTATGTAGGCGGTGCTACAGAGTTCTTGAAG  
TGGTGGCCTAACTACGGCTACACTAGAAGGACAGTATTTGGTATCTGCGCTCTGCTGAAGCCAGTTACCTT  
CGGAAAAAGAGTTGGTAGCTCTTGATCCGGCAAACAAACCACCGCTGGTAGCGGTGGTTTTTTTTGTTTGCA  
AGCAGCAGATTACGCGCAGAAAAAAGGATCTCAAGAAGATCCTTTGATCTTTTCTACGGGGTCTGACGCT  
CAGTGAACGAAAACCTCACGTTAAGGGATTTTTGGTCATGAGATTATCAAAAAGGATCTTACCTAGATCCT  
TTTTAAATTAATAATGAAGTTTTAAATCAATCTAAAGTATATATGAGTAAACTTGGTCTGACAGTTACCAAT  
GCTTAATCAGTGAGGCACCTATCTCAGCGATCTGTCTATTTTCGTTTCATCCATAGTTGCCTGACTCCCCGTC  
GTGTAGATAACTACGATACGGGAGGGCTTACCATCTGGCCCCAGTGTGCAATGATACCGCGAGACCCACG  
CTCACC GGCTCCAGATTTATCAGCAATAAACCAGCCAGCCGGAAGGGCCGAGCGCAGAAGTGGTCTGCAA  
CTTTATCCGCCTCCATCCAGTCTATTAATTGTTGCCGGGAAGCTAGAGTAAGTAGTTCCGCCAGTTAATAGT  
TTGCGCAACGTTGTTGCCATTGCTACAGGCATCGTGGTGTACGCTCGTCTGTTGGTATGGCTTCATTACG

CTCCGGTTCCCAACGATCAAGGCGAGTTACATGATCCCCATGTTGTGCAAAAAAGCGGTTAGCTCCTTCG  
GTCCTCCGATCGTTGTGTCAGAAGTAAGTTGGCCGCGAGTGTATCACTCATGGTTATGGCAGCACTGCATAAT  
TCTCTTACTGTGCATGCCATCCGTAAGATGCTTTTCTGTGACTGGTGAGTACTCAACCAAGTCATTCTGAGA  
ATAGTGTATGCGGCGACCGAGTTGCTCTTGGCCGGCGTCAATACGGGATAATACCGCGCCACATAGCAGAA  
CTTTAAAAGTGCTCATCATTGGAAAACGTTCTTTCGGGGCGAAAACCTCTCAAGGATCTTACCCTGTTGAGA  
TCCAGTTCGATGTAACCCACTCGTGCACCCAACTGATCTTCAGCATCTTTTACTTTTACCAGCGTTTCTGG  
GTGAGCAAAAACAGGAAGGCAAAATGCCGCAAAAAGGGAATAAGGGCGACACGGAAATGTTGAATACTCA  
TACTCTTCTTTTTCAATATTATTGAAGCATTTATCAGGGTTATTGTCTCATGAGCGGATACATATTTGAA  
TGTATTTAGAAAAATAAACAAATAGGGGTTCCGCGCACATTTCCCGAAAAGTGCCACCTGAACGAAGCAT  
CTGTGCTTCATTTTGTAGAACAAAATGCAACGCGAGAGCGCTAATTTTTCAAACAAAGAATCTGAGCTGC  
ATTTTTACAGAACAGAAATGCAACGCGAAAAGCGCTATTTTTACCAACGAAGAATCTGTGCTTCATTTTTGTA  
AAACAAAATGCAACGCGAGAGCGCTAATTTTTCAAACAAAGAATCTGAGCTGCATTTTTACAGAACAGAA  
ATGCAACGCGAGAGCGCTATTTTTACCAACAAAGAATCTATACTTCTTTTTTGTCTACAAAAATGCATCCC  
GAGAGCGCTATTTTTCTAACAAAGCATCTTAGATTACTTTTTTCTCCTTTGTGCGCTCTATAATGCAGTC  
TCTTGATAACTTTTTGCACTGTAGGTCCGTTAAGGTTAGAAGAAGGCTACTTTGGTGTCTATTTTTCTCTTC  
CATAAAAAAAGCCTGACTCCACTTCCCGCTTTACTGATTACTAGCGAAGCTGCGGGTGCATTTTTTCAAG  
ATAAAGGCATCCCCGATTATATTCTATAACCGATGTGGATTGCGCATACTTTGTGAACAGAAAAGTGATAGCG  
TTGATGATTCTTCATTGGTCAGAAAATTATGAACGGTTTCTTCTATTTTTGTCTCTATATACTACGTATAGG  
AAATGTTTACATTTTCGTATTGTTTTCGATTCACTCTATGAATAGTTCTTACTACAATTTTTTGTCTAAA  
GAGTAATACTAGAGATAAACATAAAAAATGTAGAGGTCGAGTTTAGATGCAAGTTCAAGGAGCGAAAGGTG  
GATGGGTAGGTTATATAGGGATATAGCACAGAGATATATAGCAAAAGAGATACTTTTGAGCAATGTTTGTGG  
AAGCGGTATTCGCAATATTTTAGTAGCTCGTTACAGTCCGGTGCCTTTTTGGTTTTTGAAGTGCGTCTT  
CAGAGCGCTTTTTGGTTTTCAAAGCGCTCTGAAGTTCCTATACTTTCTAGAGAATAGGAACCTCGGAATAG  
GAACCTCAAAGCGTTTCCGAAAACGAGCGCTTCCGAAAATGCAACGCGAGCTGCGCACATACAGCTCACTG  
TTCACGTGCGACCTATATCTGCGTGTGCTGTATATATATATACATGAGAAGAACGGCATAAGTGCCTGTT  
TATGCTTAAATGCGTACTTATATGCGTCTATTTATGTAGGATGAAAGGTAGTCTAGTACCTCCTGTGATAT  
TATCCCATTCATGCGGGGTATCGTATGCTTCTTCCAGCACTACCCTTTAGCTGTTCTATATGCTGCCACT  
CCTCAATTGGATTAGTCTCATCTTCAATGCTATCATTTCTTTGATATTGGATCATACTAAGAAACCATT  
ATTATCATGACATTAACCTATAAAAATAGGCGTATCACGAGGCCCTTTTCGTC

PRIMERS:

WC-1 FORWARD

GAAGCGGAATGGAGATGAC

WC-1 REVERSE

ATTCTTAACTCGCCGCTTCT

GFP FORWARD

TGACCCTGAAGTTCATCTGC

GFP REVERSE

GAAGTCGTGCTGCTTCATGT

ACTIN FORWARD

TCCATCATGAAGTGCGATGT

ACTIN REVERSE

CCTTCATGGAAGAAGGAGCA
